1 **Research article**

2

3 **Accelerated phosphatidylcholine turnover in macrophages promotes adipose**  
4 **tissue inflammation in obesity**

5

6 **Authors**

7

8 Kasparas Petkevicius<sup>1</sup>, Samuel Virtue<sup>1</sup>, Guillaume Bidault<sup>1</sup>, Benjamin Jenkins<sup>1</sup>,  
9 Cankut Çubuk<sup>3,4,5</sup>, Cecilia Morgantini<sup>6</sup>, Myriam Aouadi<sup>6</sup>, Joaquin Dopazo<sup>3,4,5</sup>, Mireille  
10 Serlie<sup>7</sup>, Albert Koulman<sup>1</sup>, and Antonio Vidal-Puig<sup>1,2</sup>

11

12 **Affiliations**

13

14 <sup>1</sup>University of Cambridge Metabolic Research Laboratories, Institute of Metabolic  
15 Science, MDU MRC. Addenbrooke's Hospital, Cambridge, CB2 0QQ, UK

16

17 <sup>2</sup>Wellcome Trust Sanger Institute, Hinxton CB10 1SA, UK

18

19 <sup>3</sup>Clinical Bioinformatics Area, Fundación Progreso y Salud, CDCA, Hospital Virgen del  
20 Rocio, Sevilla, Spain

21

22 <sup>4</sup>Functional Genomics Node, INB-ELIXIR-es, FPS, Hospital Virgen del Rocio, Sevilla,  
23 Spain

24

25 <sup>5</sup>Bioinformatics in Rare Diseases (BiER), Centro de Investigación Biomédica en Red  
26 de Enfermedades Raras (CIBERER), FPS, Hospital Virgen del Rocio, Sevilla, Spain

27

28 <sup>6</sup>Integrated Cardio Metabolic Centre, Department of Medicine, Karolinska Institutet,  
29 Blickagången 6, 141 57 Huddinge, Sweden

30

31 <sup>7</sup>Department of Endocrinology and Metabolism, Amsterdam University Medical  
32 Center, F5-167, Meibergdreef 9, 1105 AZ, Amsterdam, Netherlands

1 **Abstract**

2 White adipose tissue (WAT) inflammation contributes to the development of insulin  
3 resistance in obesity. While the role of adipose tissue macrophage (ATM) pro-  
4 inflammatory signalling in the development of insulin resistance has been established,  
5 it is less clear how WAT inflammation is initiated. Here, we show that ATMs from obese  
6 mice and humans exhibit markers of increased *de novo* phosphatidylcholine (PC)  
7 biosynthesis rate. Macrophage-specific knockout of phosphocholine-  
8 cytidyltransferase A (CCT $\alpha$ ), the rate-limiting enzyme of *de novo* PC biosynthesis  
9 pathway, alleviated obesity-induced WAT inflammation and insulin resistance.  
10 Mechanistically, CCT $\alpha$ -deficient macrophages showed reduced ER stress and  
11 inflammation in response to palmitate. Surprisingly, this was not due to lower  
12 exogenous palmitate incorporation into cellular PCs. Instead, CCT $\alpha$ -null macrophages  
13 had lower PC turnover, leading to elevated membrane polyunsaturated fatty acids that  
14 negated the pro-inflammatory effects of palmitate. Our results reveal a link between  
15 obesity-associated increase in PC synthesis, accelerated PC turnover and pro-  
16 inflammatory activation of ATMs.

## 1 **Introduction**

2 Obesity-related metabolic disorders are among the most prevalent causes of death  
3 worldwide. Secondary complications of obesity have been suggested to be caused by  
4 the functional failure of white adipose tissue (WAT), leading to ectopic lipid deposition,  
5 lipotoxicity and systemic insulin resistance (Virtue and Vidal-Puig, 2010). Obesity is  
6 associated with a chronic low-grade inflammation, characterised by immune cell  
7 infiltration to WAT, a switch of adipose tissue macrophage (ATM) polarisation from a  
8 tissue-remodelling (M2) to a pro-inflammatory (M1) state and elevated production of  
9 pro-inflammatory, insulin-desensitising cytokines, such as tumour necrosis factor  $\alpha$   
10 (TNF $\alpha$ ). Over the last decade, multiple genetic and pharmacological approaches have  
11 defined a causal role of macrophage-driven WAT inflammation in the development of  
12 insulin resistance (Hotamisligil, 2017). However, specific pathophysiological  
13 mechanisms triggering pro-inflammatory activation of ATMs during obesity are poorly  
14 understood.

15

16 Our previous work identified that the lipid composition of ATMs undergoes both  
17 quantitative and qualitative changes during obesity (Prieur et al., 2011). Qualitative  
18 changes in the lipid composition of both plasma and endoplasmic reticulum (ER)  
19 membranes represent a major factor promoting insulin resistance (Fu et al., 2011;  
20 Holzer et al., 2011; Wei et al., 2016). Obesity-associated alterations in ER lipid  
21 composition lead to a cellular process termed ER stress, which invokes an adaptive  
22 unfolded protein response (UPR) (Hou et al., 2014). In macrophages, the UPR is  
23 coupled to the activation of intracellular inflammatory signalling pathways that cause  
24 WAT inflammation and insulin resistance (Robblee et al., 2016; Shan et al., 2017;  
25 Suzuki et al., 2017). Furthermore, M1 macrophages are characterised by increased

1 endogenous fatty acid synthesis, which stabilises lipid rafts within plasma membrane  
2 to allow pro-inflammatory signal transduction in obesity (Wei et al., 2016). While  
3 phospholipids (PLs) are the main constituents of plasma and ER membranes, the  
4 importance of PL biosynthesis in ATMs during obesity has not yet been investigated.  
5  
6 The concept that macrophage ER stress could be induced during obesity due to  
7 changes in membrane composition is in line with the known physiological changes in  
8 lipid metabolism that occur during obesity. Obesity is associated with increased  
9 circulating saturated fatty acids (SFAs), which cause cellular ER stress by being  
10 incorporated into membrane PLs, leading to a decreased membrane fluidity due to  
11 increased membrane PL acyl chain saturation. Increased SFA-mediated ER  
12 rigidification is directly sensed by the transmembrane domains of UPR-transducing  
13 proteins (Robblee et al., 2016; Volmer et al., 2013). ER fatty acid saturation and the  
14 resulting UPR can be counteracted by both endogenously and exogenously derived  
15 mono- and polyunsaturated fatty acids (MUFAs and PUFAs), and PUFA-containing  
16 phospholipids, in particular phosphatidylcholines (PCs) (Ariyama et al., 2010;  
17 Gianfrancesco et al., 2019; Robblee et al., 2016; Rong et al., 2013).  
18  
19 PC is the most abundant PL in mammalian cells. Most cells can synthesise PC *de*  
20 *novo* through the Kennedy pathway, involving the transfer of phosphocholine onto  
21 diacylglycerol moiety. PCs synthesised *de novo* predominantly contain saturated  
22 (SFAs) and monounsaturated fatty acids (MUFAs), while polyunsaturated fatty acids  
23 (PUFAs) are incorporated into PCs via the Lands cycle, involving a hydrolysis of a  
24 single fatty acyl chain and esterification of a free PUFA to a resulting  
25 lysophosphatidylcholine (lysoPC) (Shindou et al., 2013). Metabolic flux through the *de*

1 *novo* PC synthesis pathway and cellular PC levels are greatly increased in  
2 differentiating macrophages (Ecker et al., 2010). Furthermore, pro-inflammatory  
3 signalling via toll-like receptor 4 (TLR4) increases the rate of choline uptake and *de*  
4 *novo* PC synthesis in macrophages (Sanchez-Lopez et al., 2019; Snider et al., 2018;  
5 Tian et al., 2008). However, *de novo* PC synthesis in mature macrophages is not  
6 coupled to the expansion of the cellular PC pool, as it is counteracted by  
7 phospholipase D activity, leading to a rapid turnover of membrane PCs (Jackowski et  
8 al., 1997). The consequences of altered PC turnover in metabolic disease are not  
9 currently known.

10

11 Conceptually, the rate of *de novo* PC synthesis and turnover should affect PC  
12 remodelling via Lands cycle. The role of the Lands cycle in ER stress function has  
13 been studied by genetic manipulation of the enzyme lysoPC-acyltransferase 3  
14 (LPCAT3), the major LPCAT isoform in macrophages (Jiang et al., 2018). LPCAT3  
15 overexpression increases the rate of PUFA incorporation into PCs and protects cells  
16 from palmitate-induced ER stress, while the loss of LPCAT3 sensitises cells to  
17 palmitate lipotoxicity (Rong et al., 2013).

18

19 We have previously shown that during obesity, ATMs acquire an M1 phenotype  
20 concomitantly with their intracellular lipid accumulation (Prieur et al., 2011). Here, we  
21 demonstrate that markers of *de novo* PC synthesis are increased in ATMs isolated  
22 from obese mice and humans. *Ob/ob* mice with a myeloid cell-specific reduction in *de*  
23 *novo* PC synthesis rate display reduced adipose tissue inflammation and improved  
24 metabolic profile compared to controls. Mechanistically, we show that reducing the  
25 activity of the *de novo* PC synthesis pathway by 30% does not reduce total cellular PC

1 levels in macrophages. Instead, the reduction in PC synthesis is balanced by a  
2 reduction in PC degradation, maintaining the cellular PC pool size but increasing the  
3 half-life of PCs. The extended PC half-life leads to increased incorporation of PUFAs  
4 into PCs by allowing more time for PC remodelling. Elevated PC PUFA content  
5 protects macrophages from palmitate-induced ER stress and pro-inflammatory  
6 activation.

## 1 **Results**

### 2 **Obesity accelerates *de novo* PC biosynthesis in ATMs**

3 In order to identify intrinsic metabolic pathways associated with the phenotypic switch  
4 of ATMs towards an M1 polarisation state, we reanalysed our published microarray  
5 dataset (GSE36669) of epididymal WAT (eWAT) macrophages isolated from WT and  
6 ob/ob animals using inferred metabolic flux analysis (Cubuk et al., 2018a; 2018b). We  
7 focused on the pathways that were unchanged or downregulated in 5-week-old ob/ob  
8 ATMs, which are predominantly M2-polarised, but upregulated at 16 weeks of age,  
9 when eWAT of ob/ob mice is inflamed (Prieur et al., 2011). Among the metabolic  
10 pathways that fitted these criteria was *de novo* PC biosynthesis (Figure 1a-b), with a  
11 lower inferred activity score in 5-week-old, but higher score in 16-week-old ob/ob  
12 ATMs compared to age-matched WT controls (Figure 1d). Further analysis of the  
13 processes that were unchanged at 5 weeks but upregulated at 16 weeks in ob/ob  
14 ATMs revealed several pathways related to PL metabolism (Figure 1d, Table S1). The  
15 activity of *de novo* PE biosynthesis pathway was not modulated in ob/ob ATMs (Figure  
16 1-figure supplement 1a-b).

17

18 We next determined whether increased inferred activity of the *de novo* PC synthesis  
19 pathway in obesity was specific to ATMs, or also occurred in other tissue-resident  
20 macrophages. We performed global transcriptomic comparison between liver  
21 macrophages isolated from 14-week-old ob/ob and control mice. Unlike ATMs, liver  
22 macrophages isolated from obese mice showed similar expression levels of *de novo*  
23 PC biosynthesis pathway constituents compared to controls (Figure 1-figure  
24 supplement 2).

25

1 In accordance with our ATM transcriptomic analysis, the expression of *Pcyt1a*,  
2 encoding phosphocholine cytidyltransferase A (CCT $\alpha$ ), the rate-limiting enzyme in  
3 *de novo* PC synthesis pathway, was unchanged at 5 weeks, but increased at 16 weeks  
4 in ob/ob ATMs compared to WT controls when measured by qPCR (Figure 1e). In  
5 contrast, the *Pcyt1a* paralogue *Pcyt1b* was down-regulated at 5 weeks and not  
6 modulated at 16 weeks in ob/ob ATMs (Figure 1-figure supplement 1c). Furthermore,  
7 *Pcyt1a* expression in macrophages isolated from the WAT of obese individuals was  
8 positively correlated with BMI (Figure 1f). Of note, out of all analysed tissue  
9 macrophage populations publicly available in Immgen database (Heng et al., 2008),  
10 ATMs had the highest expression of *Pcyt1a* transcript (Figure 1-figure supplement 3).  
11  
12 We then reanalysed our previously published lipid profiles from ob/ob ATMs (Prieur et  
13 al., 2011), focusing only on measured PL species. Relative to the total PL amount,  
14 both PC abundance and PC:PE molar ratio tended to increase (Figure 1-figure  
15 supplement 4a-b), and palmitate- and stearate-containing lysoPC species were  
16 upregulated in 16-week-old ob/ob ATMs compared to WT controls (Figure 1g). It has  
17 been previously shown that hepatic lysoPC levels are reduced when the balance  
18 between PC synthesis and LPCAT activity is perturbed. Specifically, increasing  
19 LPCAT3 activity without changing *de novo* PC synthesis or breakdown reduces  
20 LysoPC levels, as LPCAT3 re-esterifies LysoPC into PC (Rong et al., 2013).  
21 Conversely, in obese WAT, despite the upregulation of *Lpcat3* transcript at both 5 and  
22 16 weeks in ob/ob ATMs (Figure 1-figure supplement 5a), we observed increased  
23 lysoPC species in ob/ob ATMs (Figure 1g). The elevation in LysoPCs was therefore  
24 consistent with obesity causing a disproportional increase in the rate of both *de novo*



1 PC synthesis and hydrolysis that exceeded the capacity of LPCAT3 to re-esterify Lyso-  
 2 PC back into PC (Figure 1-figure supplement 5b).

3

4 **Figure 1** with 5 supplements

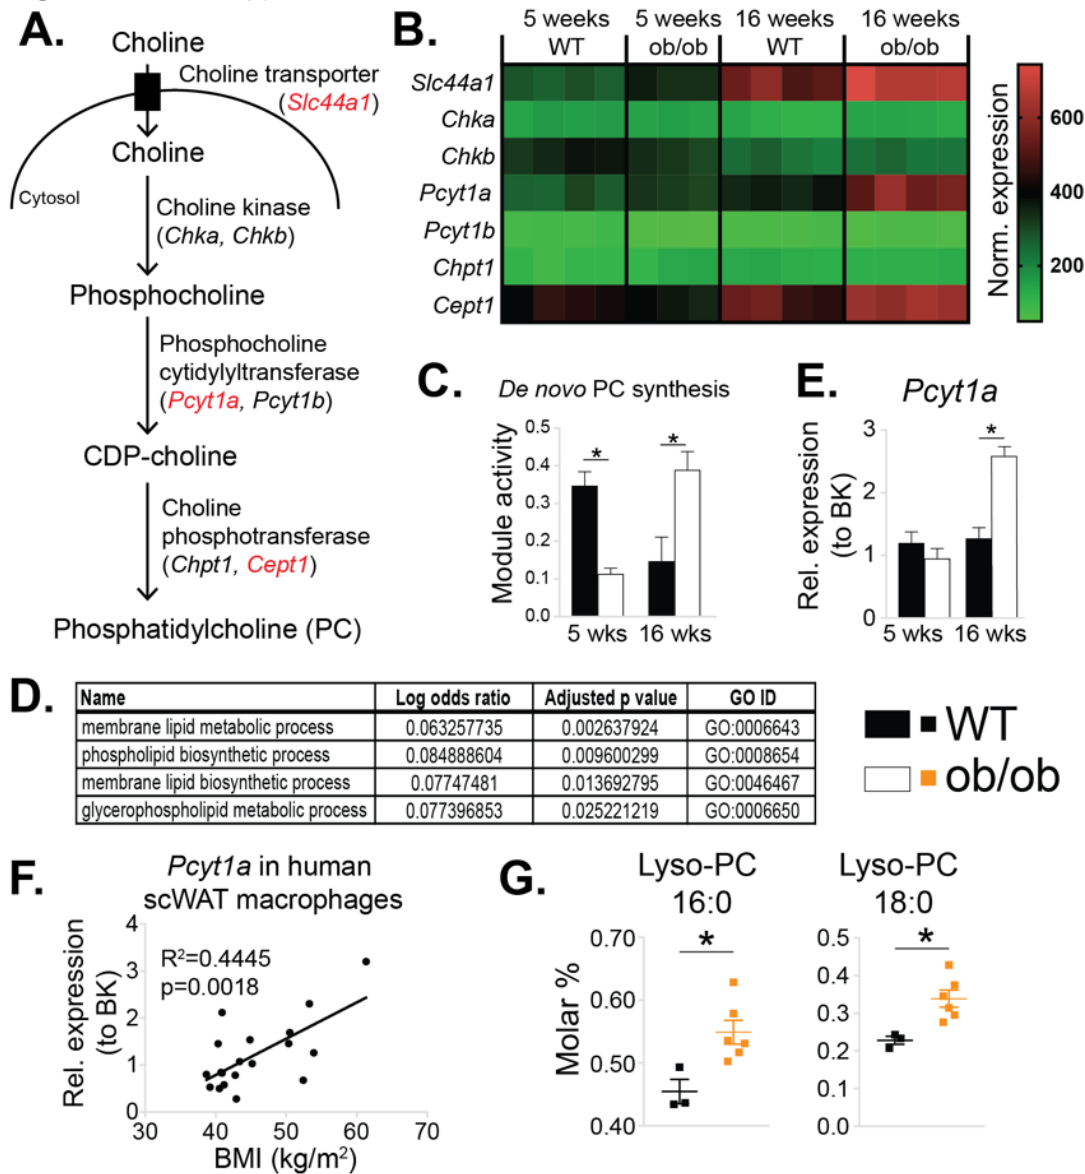

5

6 **De novo PC synthesis rate is increased in ATMs during obesity.**

7 (A) Simplified schema of the Kennedy pathway of *de novo* PC biosynthesis. Transcripts in red are  
 8 upregulated in 16-week-old ob/ob eWAT macrophages compared to WT controls.

9 (B) Normalised microarray gene expression values for the enzymes of the Kennedy pathway of *de novo*  
 10 PC biosynthesis in eWAT macrophages. Each presented replicate corresponds to a pool of cells  
 11 isolated from 5 animals.

12 (C) *De novo* PC biosynthesis pathway module (M00090) activity in eWAT macrophages, as inferred by  
 13 the Metabolizer algorithm.

14 (D) Gene Ontology (GO) pathways related to membrane lipid metabolism that are increased in ob/ob  
 15 eWAT macrophages at 16 weeks, but not at 5 weeks of age compared to WT controls.

16 (E) *Pcyt1a* expression in eWAT macrophages, measured by qPCR.

17 (F) *Pcyt1a* expression, measured by qPCR in subcutaneous WAT macrophages isolated from obese  
 18 patients undergoing bariatric surgery, plotted against their body weight (n=19).

1 (G) Molar abundance of 16:0 and 18:0 lyso-PC species (expressed as percentage of total measured  
 2 PLs) in eWAT macrophages (n=3 pools of 5 WT, n=6 ob/ob mice).  
 3 \*p < 0.05 between genotypes, error bars indicate SEM.

4

5 **Figure 1-figure supplement 1**

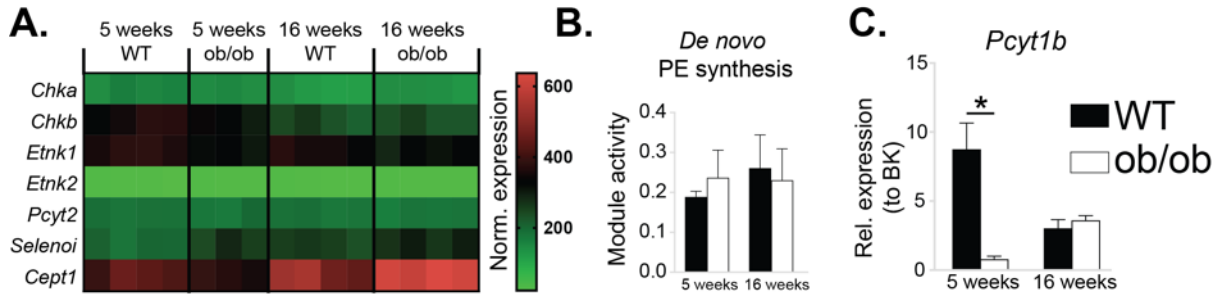

6

7 **Obesity does not affect *de novo* PE synthesis rate in ATMs.**

8 (A) Normalised microarray gene expression for the enzymes of the Kennedy pathway of *de novo* PE  
 9 biosynthesis in eWAT macrophages.

10 (B) *De novo* PE biosynthesis pathway module (M00092) activity in eWAT macrophages, as inferred by  
 11 the Metabolizer algorithm.

12 (C) *Pcyt1b* expression in eWAT macrophages, measured by qPCR.

13 \*p < 0.05 between genotypes, error bars indicate SEM.

14

15 **Figure 1-figure supplement 2**

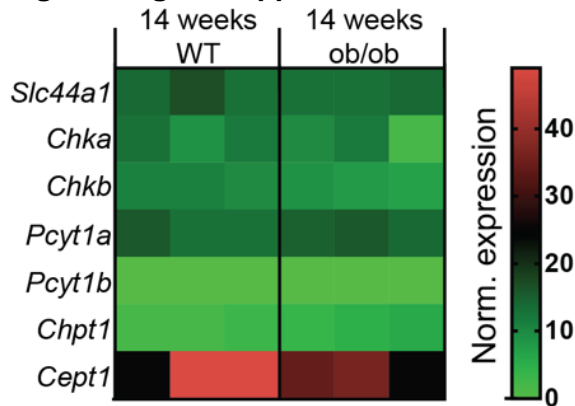

16

17 **Obesity does not affect *de novo* PC synthesis rate in liver macrophages.**

18 Normalised RNAseq gene expression for the enzymes of the Kennedy pathway of *de novo* PC  
 19 biosynthesis in liver macrophages, isolated from 14-week-old WT and ob/ob mice (n=3).

1 **Figure 1-figure supplement 3**

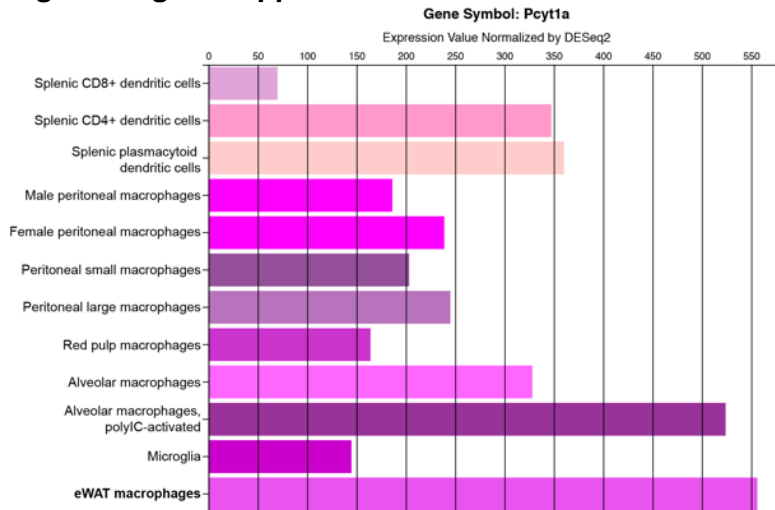

2 ***Pcyt1a* expression levels in different tissue macrophage populations.**

3 Figure indicating *Pcyt1a* mRNA levels in isolated tissue macrophage populations, measured by  
 4 RNAseq was obtained directly from Immgen database ([www.immgen.org](http://www.immgen.org)).  
 5  
 6  
 7

8 **Figure 1-figure supplement 4**

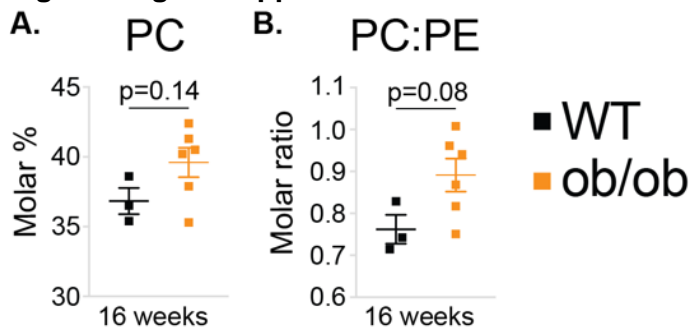

9 **Obesity tends to increase PC molar percentage and PC to PE molar ratio in ATMs.**

10 (A) PC molar abundance (expressed as percentage of total measured PLs), and (B) PC:PE molar ratio  
 11 in eWAT macrophages (n=3 pools of 5 WT, n=6 16-week-old ob/ob mice). Error bars indicate SEM.  
 12  
 13  
 14

15 **Figure 1-figure supplement 5**

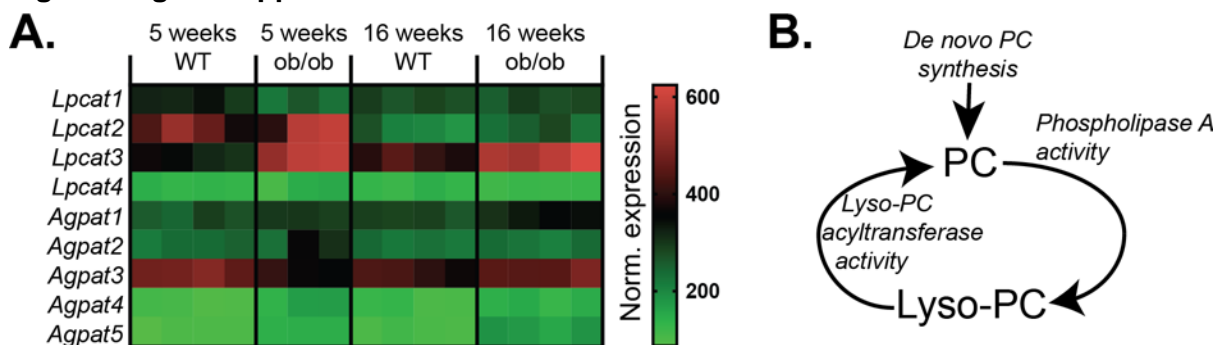

16 **The effects of obesity on PC remodelling gene expression in ATMs.**

17 (A) Normalised microarray gene expression for the enzymes involved in PC remodelling in eWAT  
 18 macrophages.  
 19

20 (B) Simplified schema of the interaction between *de novo* PC synthesis and PC remodelling pathways.

## 1 ***Pcyt1a* deletion in myeloid cells improves glucose metabolism in obese mice**

2 To test if increased PC biosynthesis in ATMs affected whole-organism metabolic  
3 homeostasis, we investigated mice with *Pcyt1a* deletion in myeloid cells (CCT $\alpha$  mKO)  
4 that have been described previously (Tian et al., 2008). Initially, we sought to validate  
5 whether the loss of *Pcyt1a* would impact macrophage differentiation or function *in vitro*  
6 and *in vivo*. As indicated by the normal surface expression of macrophage markers  
7 F4/80, CD206 and CD301, unaltered bacterial phagocytosis and normal TNF $\alpha$  and  
8 IL-6 cytokine secretion in response to LPS, the differentiation of CCT $\alpha$ -null bone  
9 marrow cells into macrophages (BMDMs) was not impaired (Figure 2-figure  
10 supplement 1a-c). *Pcyt1a* transcript levels in BMDMs on a C57Bl6/J genetic  
11 background were reduced by ~50%, which translated into ~80% decrease in CCT $\alpha$   
12 protein expression and ~30% decrease in *de novo* PC synthesis rate compared to  
13 controls (Figure 2-figure supplement 1d). *In vivo*, the expression of macrophage  
14 mRNA markers in eWAT and liver was comparable between CCT $\alpha$  mKO and control  
15 animals (Figure 2-figure supplement 2a-b). Overall, these results confirmed that loss  
16 of *Pcyt1a* reduced *de novo* PC biosynthesis rate in macrophages without altering their  
17 development or function.

18

19 CCT $\alpha$  mKO mice exhibited similar growth rates and metabolic tissue weights  
20 compared to controls (Figure 2-figure supplement 3a-b). No differences in glucose or  
21 insulin tolerance tests were observed between CCT $\alpha$  mKO and control groups (Figure  
22 2-figure supplement 3c-d). In accordance, the expression levels of insulin-regulated  
23 metabolic genes were similar in eWAT and liver of CCT $\alpha$  mKO and control mice  
24 (Figure 2-figure supplement 2a-b).

25

1 We next evaluated the importance of increased macrophage *de novo* PC synthesis in  
2 obesity. We first confirmed that bone marrow transplantation did not alter the induction  
3 of *Pcyt1a* in the ob/ob genetic background (Figure 2-figure supplement 4). We then  
4 transplanted CCT $\alpha$  mKO or control bone marrow into irradiated ob/ob animals (Figure  
5 2a). While no differences in post-irradiation body weight gain, WAT and liver mass  
6 were observed (Figure 2b-c), ob/ob mice carrying CCT $\alpha$  mKO bone marrow tended to  
7 have improved glucose tolerance and exhibited increased sensitivity to exogenous  
8 insulin compared to controls (Figure 2d-e). Overall, macrophage-specific *Pcyt1a*  
9 deletion did not affect ATM development, adipose tissue function and glucose  
10 metabolism in lean animals, but improved systemic glucose handling in ob/ob mice,  
11 the model of obesity in which we originally observed an induction of *Pcyt1a* in the ATM  
12 population.

1 **Figure 2 with 4 supplements**

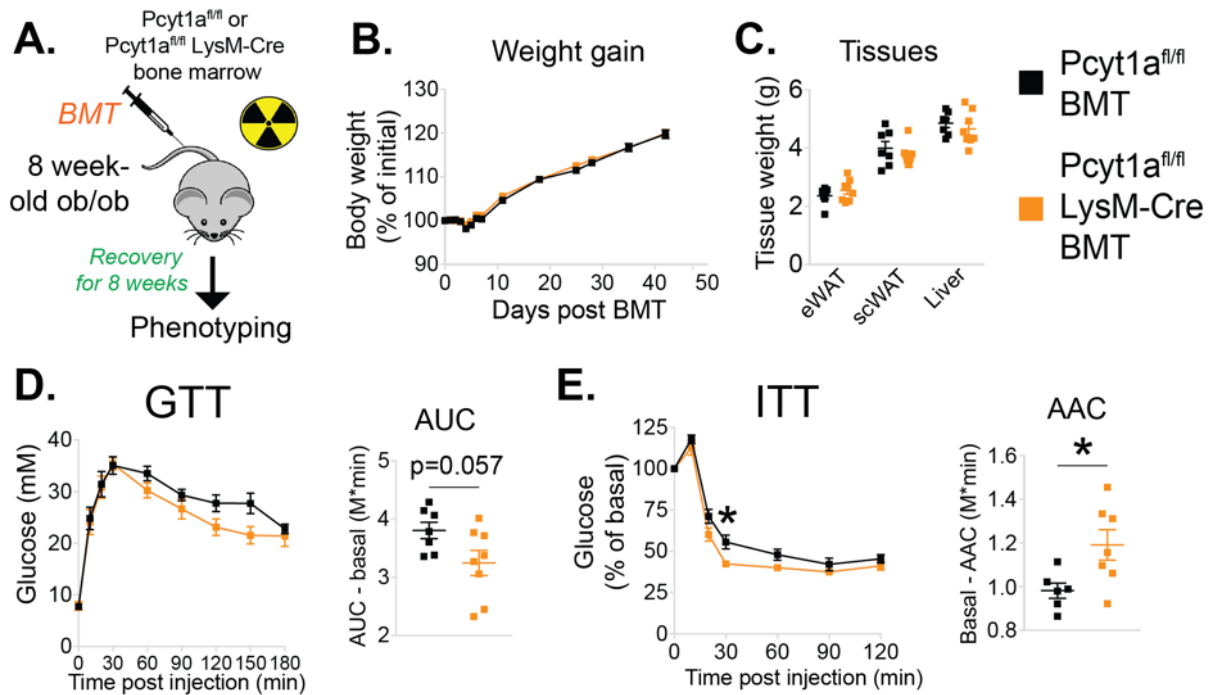

2  
3 **Myeloid cell-specific deletion of *Pcyt1a* leads to improved systemic glucose metabolism on the**  
4 **ob/ob genetic background.**

5 (A) Schema of the BMT study design.

6 (B) Body weight gain curves and (C) weights of indicated tissues of ob/ob mice transplanted with  
7 Pcyt1a<sup>fl/fl</sup> (n=7) or Pcyt1a<sup>fl/fl</sup> LysM-Cre (n=8) bone marrow.

8 (D) GTT curves and areas under curve (AUC), normalised to basal glucose levels.

9 (E) ITT curves, presented as percentage values of basal glucose levels, and areas above curve (AAC),  
10 normalised to basal glucose levels.

11 \*p < 0.05 between genotypes, error bars indicate SEM.

12  
13  
14 **Figure 2-figure supplement 1**

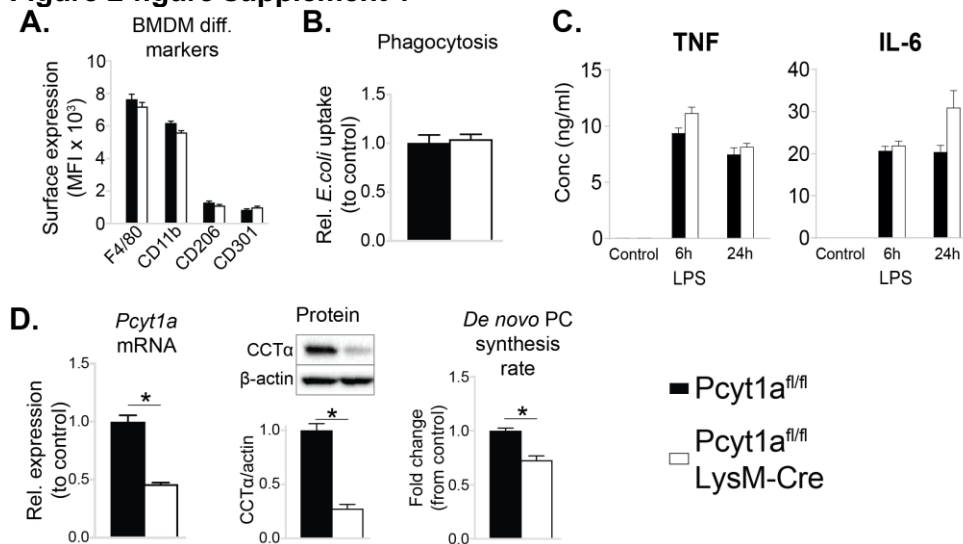

15  
16 **Myeloid cell-specific deletion of *Pcyt1a* does not impair BMDM differentiation or function *in***  
17 ***vitro*.**

18 (A) Flow cytometry quantification of macrophage differentiation markers.

19 (B) Phagocytosis of *E. coli* (normalised to control values).

20 (C) Cytokine secretion into the medium of BMDMs stimulated with LPS for 6 or 24 hours.

21 (D) *Pcyt1a* expression, CCTα protein levels and <sup>3</sup>H-choline incorporation rate into membrane lipids.

1 Pcyt1a<sup>fl/fl</sup> (n=4) or Pcyt1a<sup>fl/fl</sup> LysM-Cre (n=4) BMDMs in all experiments. \*p < 0.05 between genotypes,  
 2 error bars indicate SEM.  
 3  
 4

5 **Figure 2-figure supplement 2**

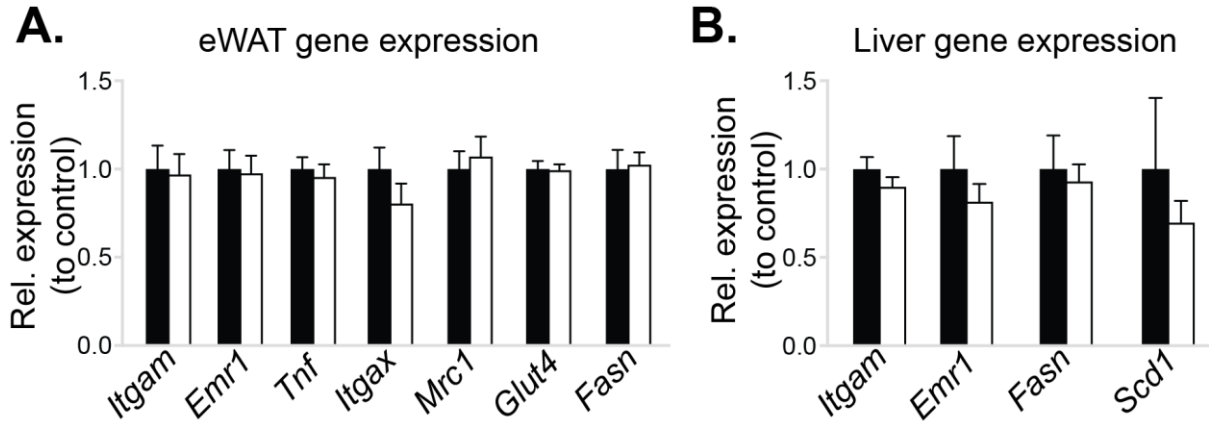

6  
 7 **Myeloid cell-specific deletion of *Pcyt1a* does not affect eWAT or liver gene expression in lean**  
 8 **mice.**

9 Normalised expression of indicated genes in (A) eWAT and (B) liver of Pcyt1a<sup>fl/fl</sup> (n=7) or Pcyt1a<sup>fl/fl</sup>  
 10 LysM-Cre (n=9) animals on a C57Bl/6J genetic background, measured by qPCR. Error bars indicate  
 11 SEM.  
 12  
 13  
 14

15 **Figure 2-figure supplement 3**

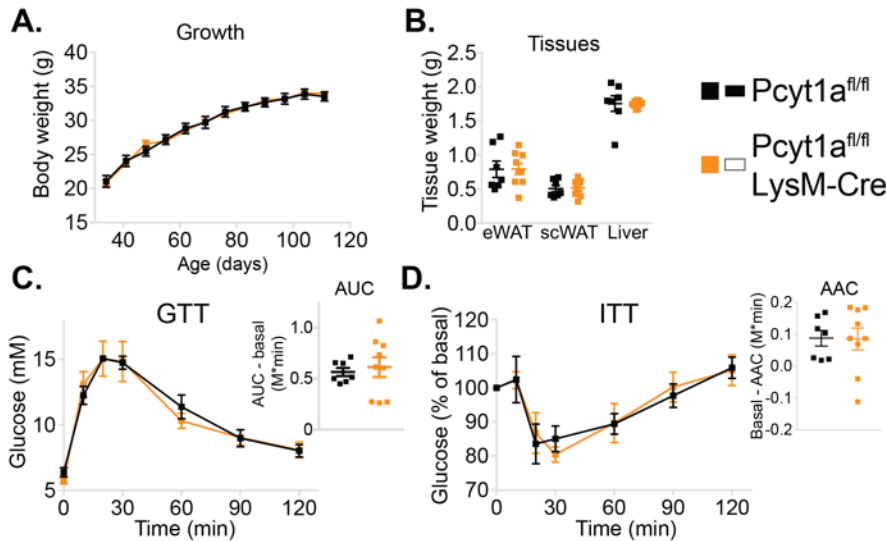

16 **Myeloid cell-specific deletion of *Pcyt1a* does not affect growth or glucose metabolism of lean**  
 17 **mice.**

18 (A) Body weight gain curves and (B) tissue weights of lean mice.  
 19 (C) GTT curves and areas under curve (AUC), normalised to basal glucose levels.  
 20 (D) ITT curves, presented as percentage values of basal glucose levels, and areas above curve (AAC),  
 21 normalised to basal glucose levels. Error bars indicate SEM.  
 22

1 **Figure 2-figure supplement 4**

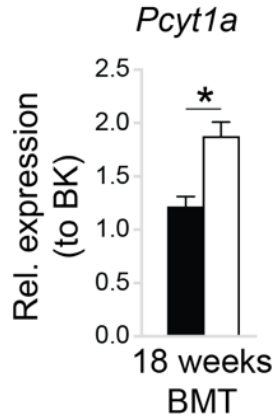

2

3 **WT to ob/ob bone marrow transplant does not affect the increase of *Pcyt1a* transcription in**  
4 **eWAT ATMs.**

5 *Pcyt1a* expression measured by qPCR in eWAT macrophages isolated from WT and ob/ob mice  
6 carrying WT bone marrow at 18 weeks of age (n=7 mice/group). \*p < 0.05 between genotypes, error  
7 bars indicate SEM.



## 1 ***Pcyt1a* deletion in myeloid cells alleviates inflammation and improves insulin** 2 **signalling in the WAT of obese mice**

3 While the metabolic effects of macrophage-specific *Pcyt1a* deletion on an ob/ob  
4 background were modest, they were consistent with the relatively small reduction  
5 (30%) in *de novo* PC biosynthesis rate we observed in BMDMs *in vitro*. We next sought  
6 to determine how *Pcyt1a* deficiency in macrophages improved glucose metabolism in  
7 obese mice. First, we performed whole transcriptome comparison of eWAT isolated  
8 from CCT $\alpha$  mKO ob/ob BMT and control animals. Pathway analysis of the  
9 transcriptomic data revealed an increase in transcripts associated with insulin  
10 sensitivity and glucose metabolism, while pathways related to ER stress and  
11 macrophage-driven inflammation were suppressed in CCT $\alpha$  mKO compared to control  
12 BMT ob/ob mice (Figure 3a, Table S2). RNA sequencing results were also confirmed  
13 by qPCR (Figure 2-figure supplement 1a). In accordance to the gene expression data,  
14 insulin-responsive AKT phosphorylation was increased in the eWAT of CCT $\alpha$  mKO  
15 ob/ob animals compared to controls (Figure 3b-c). Furthermore, while we found no  
16 differences in total ATM number, eWAT macrophages showed a shift from M1 to M2  
17 polarisation in CCT $\alpha$  mKO compared to controls (Figure 3d). No differences in the  
18 number of crown-like structures (CLS) and eWAT adipocyte area were observed  
19 between genotypes (Figure 3-figure supplement 2a-c). Finally, unlike eWAT, the  
20 expression of pro-inflammatory and insulin-responsive marker genes in the liver were  
21 similar between genotypes (Figure 2-figure supplement 1b). Altogether, we have  
22 found that reducing *de novo* PC biosynthesis rate in macrophages alleviates WAT  
23 inflammation and insulin resistance in obese mice, without affecting total ATM and  
24 CLS number.

1 **Figure 3 with 2 supplements**

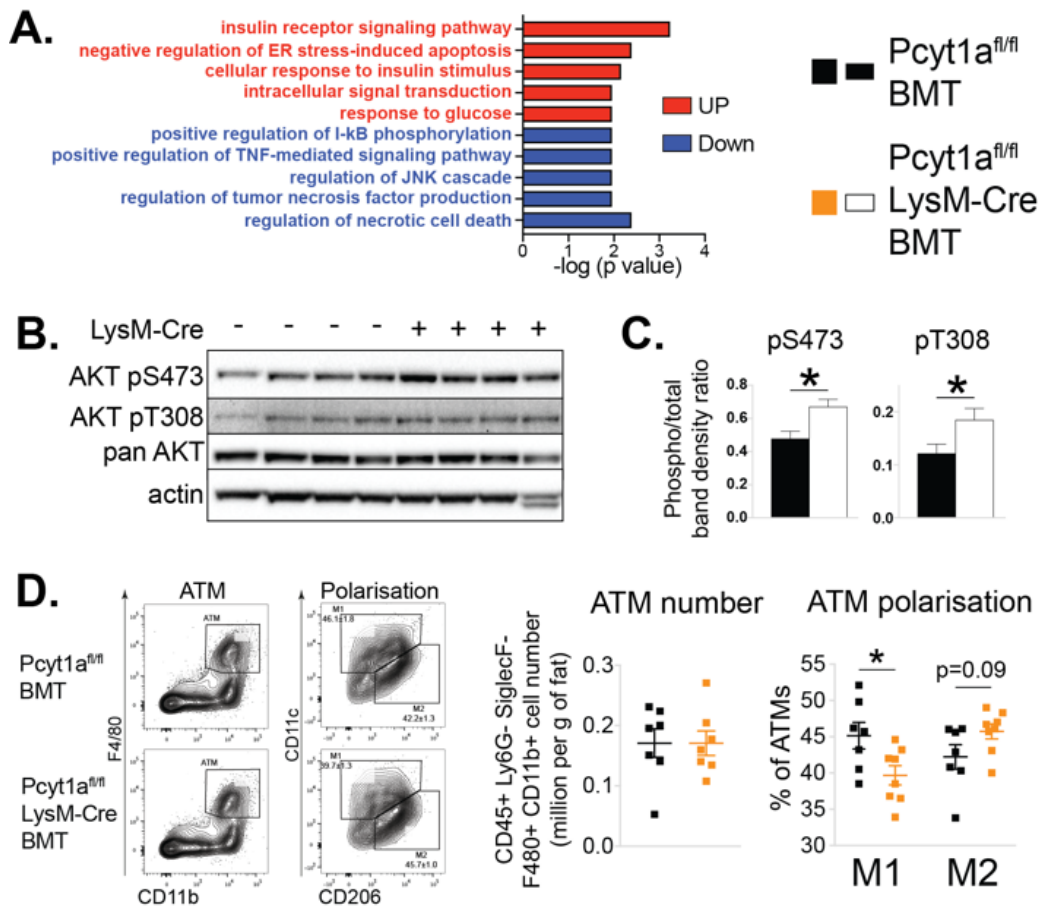

2  
3 **Myeloid cell-specific deletion of *Pcyt1a* leads to reduced WAT inflammation on the ob/ob genetic**  
4 **background.**

5 (A) Selected pathways from eWAT RNAseq analysis, upregulated (red) or downregulated (blue) in  
6 ob/ob mice transplanted with *Pcyt1a*<sup>fl/fl</sup> LysM-Cre (n=8) bone marrow compared to controls (n=7).  
7 (B) Representative AKT phosphorylation Western blots and (C) their densitometry quantification in  
8 eWAT of ob/ob mice transplanted with *Pcyt1a*<sup>fl/fl</sup> (n=7) or *Pcyt1a*<sup>fl/fl</sup> LysM-Cre (n=8) bone marrow.  
9 (D) Flow cytometry gating strategy, quantification of ATM number per gram of eWAT and the relative  
10 polarisation of ATM population in ob/ob mice.

11 \*p < 0.05 between genotypes, error bars indicate SEM.

12

13

14

**Figure 3-figure supplement 1**

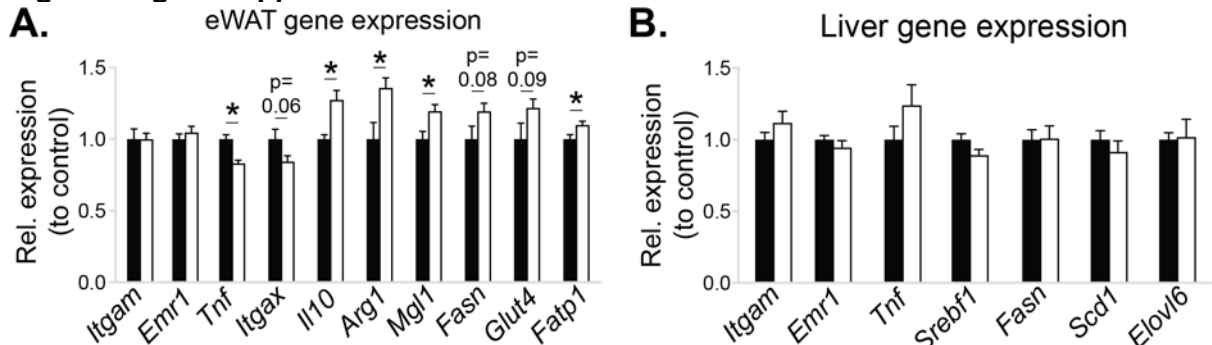

15

16

17

18

19

**The effects of myeloid cell-specific deletion of *Pcyt1a* on eWAT and liver gene expression on the ob/ob genetic background.**

Relative expression of indicated genes in the (A) eWAT and (B) liver of ob/ob BMT mice, measured by qPCR. \*p < 0.05 between genotypes, error bars indicate SEM.

1 **Figure 3-figure supplement 2**

**A.**

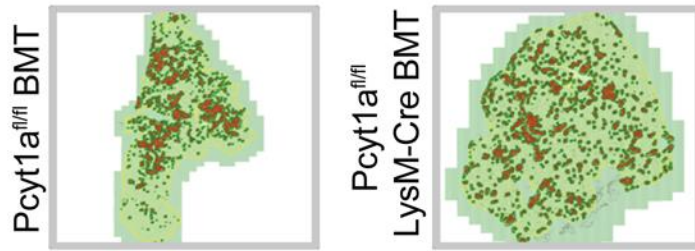

**B.**

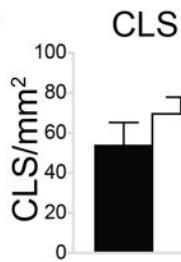

**C.**

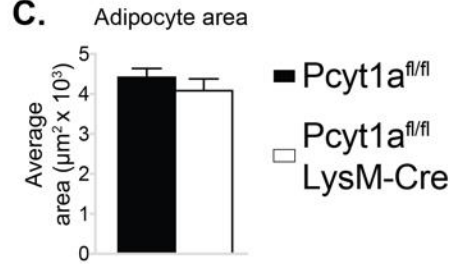

2

3 **Myeloid cell-specific deletion of *Pcyt1a* does not affect eWAT CLS number or adipocyte size on**  
4 **the ob/ob genetic background.**

5 (A) Representative histology images of eWAT sections of ob/ob BMT mice, CLS are marked in red.  
6 Quantification of (B) CLS and (C) average adipocyte area in the eWAT sections of ob/ob BMT mice.  
7 Error bars indicate SEM.

## 1 **Loss of *Pcyt1a* lowers palmitate-induced ER stress and inflammation in** 2 **macrophages**

3 Next, we sought to investigate the molecular events that reduce WAT inflammation in  
4 obese animals carrying CCT $\alpha$  mKO bone marrow. For this purpose, we utilised an *in*  
5 *vitro* model of BMDMs exposed to high palmitate concentrations. We selected  
6 palmitate concentrations that have previously been reported to induce ER stress and  
7 pro-inflammatory activation, thus mimicking the effects of obesity on ATMs (Robblee  
8 et al., 2016). We observed diminished *Tnf* transcript levels in palmitate-treated CCT $\alpha$ -  
9 null macrophages compared to controls (Figure 4a). Reduced inflammation in BMDMs  
10 was accompanied by a lower ER stress response to palmitate, as indicated by lower  
11 induction of ER stress marker gene expression and reduced stress-responsive kinase  
12 activation in CCT $\alpha$ -null BMDMs compared to controls (Figure 4b-d).

13  
14 Furthermore, CCT $\alpha$ -null BMDMs were less susceptible to palmitate-induced cell death  
15 than controls (Figure 4-figure supplement 1a). While *Pcyt1a* deficiency was protective  
16 against cytotoxicity in response to palmitate, it was detrimental in response to other  
17 ER stressors, including thapsigargin (Figure 4-figure supplement 1b) and free  
18 cholesterol (Zhang et al., 2000). Finally, cultured peritoneal macrophages isolated  
19 from CCT $\alpha$  mKO animals also showed reduced ER stress response to palmitate  
20 compared to controls (Figure 4-figure supplement 2). Overall, CCT $\alpha$ -null  
21 macrophages were protected against palmitate-induced ER stress and subsequent  
22 cytotoxicity and inflammation.

1 **Figure 4 with 2 supplements**

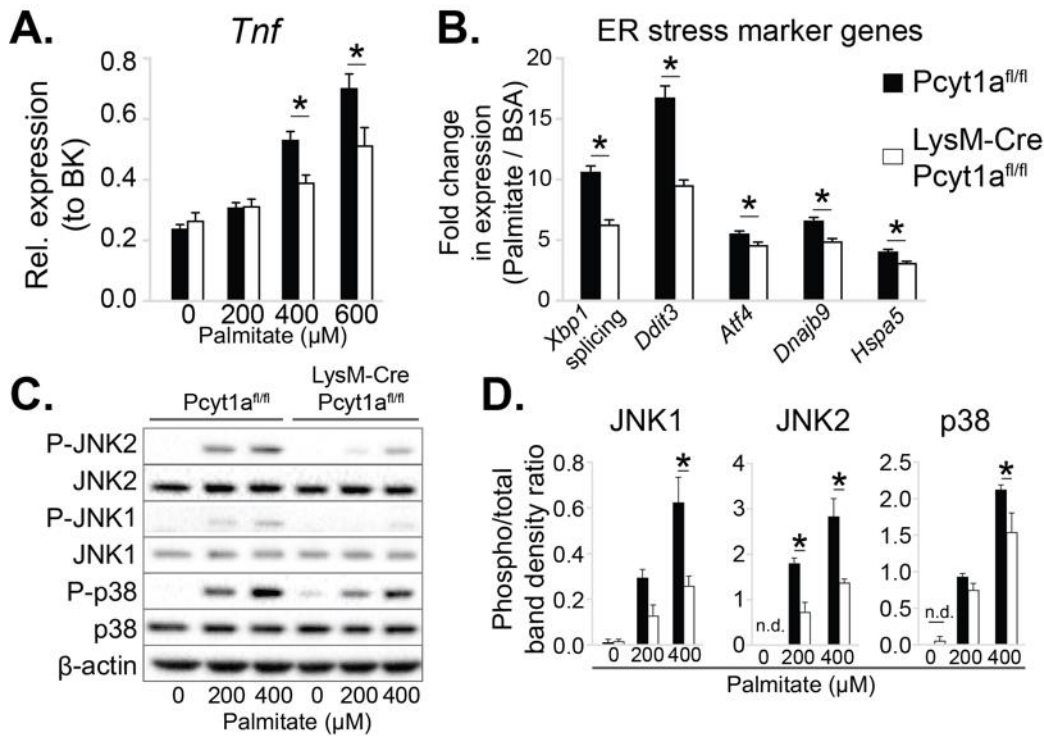

2 ***Pcyt1a* deficiency protects macrophages from palmitate-induced ER stress and inflammation.**

3 (A) *Tnf* expression levels in Pcyt1a<sup>fl/fl</sup> (n=5) or Pcyt1a<sup>fl/fl</sup> LysM-Cre (n=3) BMDMs treated with indicated  
4 doses of palmitate for 16 hours.

5 (B) Fold induction (compared to BSA alone) of indicated ER stress marker gene expression in Pcyt1a<sup>fl/fl</sup>  
6 (n=7) or Pcyt1a<sup>fl/fl</sup> LysM-Cre (n=8) BMDMs treated with 250 μM palmitate for 16 hours.

7 (C) Representative Western blots and (D) their densitometry quantification of Pcyt1a<sup>fl/fl</sup> (n=5) or  
8 Pcyt1a<sup>fl/fl</sup> LysM-Cre (n=3) BMDMs treated with indicated doses of palmitate for 16 hours.

9 \*p < 0.05 between genotypes, error bars indicate SEM. All presented experiments are representative  
10 of at least 3 BMDM cultures.

11 **Figure 4-figure supplement 1**

12 **Cell death assay**

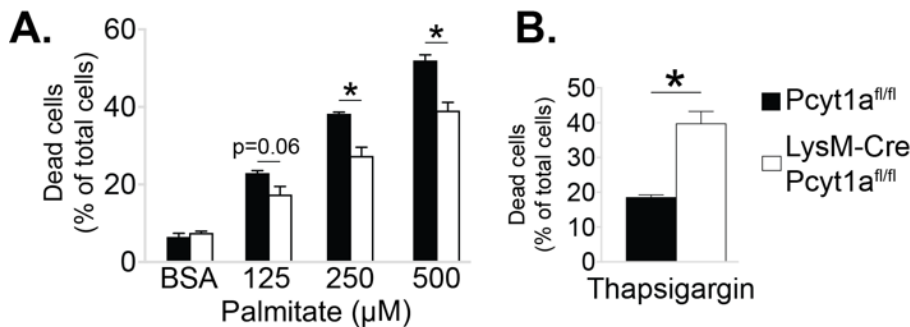

13 ***Pcyt1a* deficiency protects macrophages from palmitate, but not thapsigargin-induced cell death.**

14 Flow cytometry quantification of dead Pcyt1a<sup>fl/fl</sup> (n=4) or Pcyt1a<sup>fl/fl</sup> LysM-Cre (n=4) BMDMs treated with  
15 indicated doses of (A) palmitate or (B) 150 nM thapsigargin for 16 hours. \*p < 0.05 between genotypes,  
16 error bars indicate SEM.

1 **Figure 4-figure supplement 2**

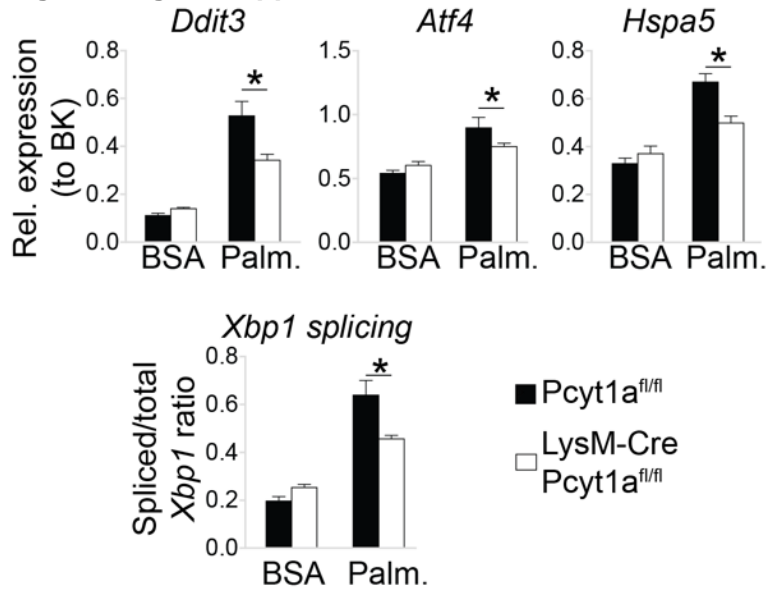

2

3 ***Pcyt1a* deficiency protects peritoneal macrophages from palmitate-induced ER stress.**

4 ER stress marker gene expression in cultured peritoneal macrophages from Pcyt1a<sup>fl/fl</sup> (n=4) or Pcyt1a<sup>fl/fl</sup>  
5 LysM-Cre (n=8) treated with 250  $\mu$ M palmitate for 16 hours. \*p < 0.05 between genotypes, error bars  
6 indicate SEM.

1 ***De novo* PC biosynthesis pathway does not incorporate exogenous palmitate**  
2 **into macrophage membrane PCs**

3 We next investigated how mitigating CCT $\alpha$  activity caused a reduction in palmitate-  
4 induced ER stress. As the *de novo* PC biosynthesis pathway had been suggested to  
5 control the flux of exogenous palmitate into cellular PCs (Robblee et al., 2016), we  
6 hypothesised that CCT $\alpha$ -null BMDMs would have a reduced rate of palmitate  
7 incorporation into their membranes. In order to test our hypothesis, we traced the  
8 incorporation of exogenous palmitate into cellular PCs over time. Surprisingly, CCT $\alpha$ -  
9 null and control BMDMs showed no differences in the rate of radiolabelled palmitate  
10 appearance in total lipid or PC fractions (Figure 5a-b).

11

12 We then attempted to validate our unexpected findings using acute pharmacological  
13 inhibition of CCT $\alpha$  by miltefosine. Miltefosine reduced the rate of *de novo* PC synthesis  
14 in palmitate-treated BMDMs in a dose-response manner (Figure 5c). In contrast, only  
15 100  $\mu$ M concentration of miltefosine showed an inhibitory effect on the incorporation  
16 of palmitate into membrane PCs (Figure 5c). Importantly, and in line with the evidence  
17 from our genetic model, the dose of miltefosine that reduced *de novo* PC biosynthesis  
18 rate by 30% (as we have observed in CCT $\alpha$ -null BMDMs, Figure 2-figure supplement  
19 1d) had no effect on the rate of incorporation of exogenous palmitate into cellular PCs  
20 in BMDMs (Figure 5c).

21

22 It has been proposed that the Kennedy pathway is coupled to endogenous cellular  
23 fatty acid synthesis (Ecker et al., 2010; Ridgway and Lagace, 2003). In accordance,  
24 acetate incorporation into cellular PCs and total lipids showed a similar fold decrease  
25 (approximately 30%) as the reduction in *de novo* PC synthesis rate in CCT $\alpha$ -null

1 macrophages (Figure 5d-e). Overall, we found that reducing the rate of *de novo* PC  
2 synthesis in macrophages proportionally decreased the rate of incorporation of lipids  
3 derived from *de novo* lipogenesis, which are known to be incorporated by the Kennedy  
4 pathway, but did not affect the rate of exogenous palmitate incorporation into  
5 membrane lipids.



1 **Figure 5 with no supplements**

**A.**  $^{14}\text{C}$ -palmitate incorporation into PC fraction

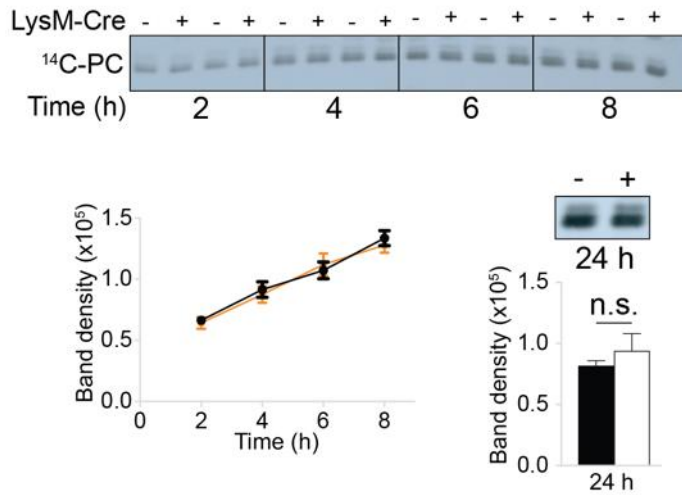

**B.** Into total lipids

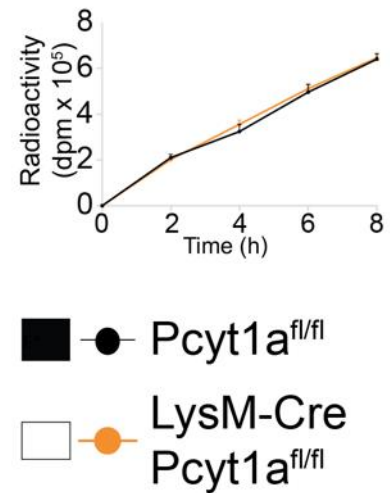

**C.** CCT $\alpha$  pharmacological inhibition

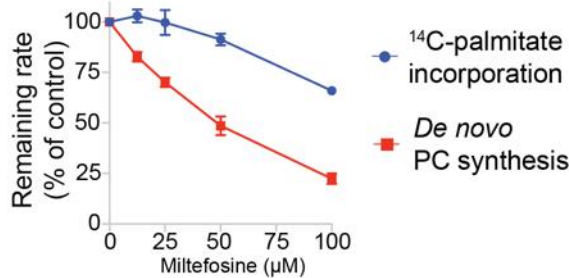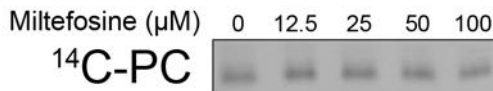

**D.**

$^{14}\text{C}$ -acetate incorporation into PC fraction

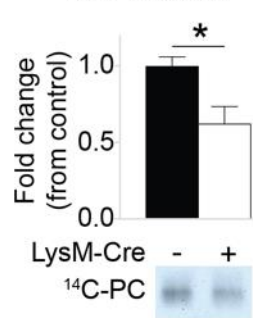

**E.**

Into total lipids

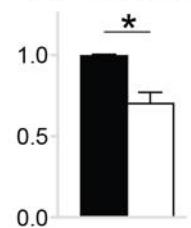

**Pcyt1a deficiency in macrophages does not affect the rate of exogenous palmitate incorporation into PCs.**

(A) Representative autoradiogram and densitometry quantification of  $^{14}\text{C}$ -palmitate incorporation into PCs or (B) total lipids of Pcyt1a<sup>fl/fl</sup> (n=4) or Pcyt1a<sup>fl/fl</sup> LysM-Cre (n=4) BMDMs treated with 250  $\mu\text{M}$  palmitate for indicated periods of time.

(C) Inhibition of *de novo* PC biosynthesis (red line) and  $^{14}\text{C}$ -palmitate incorporation into PC fraction (blue line) of WT BMDMs (n=4), pretreated with indicated doses of miltefosine for 1 hour and stimulated with 250  $\mu\text{M}$  palmitate for 3 hours. Representative autoradiogram is presented below.

(D) Representative autoradiogram and densitometry quantification of  $^{14}\text{C}$ -acetate incorporation into PCs or (E) total lipids of untreated Pcyt1a<sup>fl/fl</sup> (n=4) or Pcyt1a<sup>fl/fl</sup> LysM-Cre (n=4) BMDMs over 3 hours, normalised to Pcyt1a<sup>fl/fl</sup> group average.

\*p < 0.05 between genotypes, error bars indicate SEM. Findings are representative of at least 3 BMDM cultures.

1 **Loss of *Pcyt1a* in macrophages increases membrane PUFA abundance that**  
2 **protects against palmitate-induced ER stress**

3 As our tracer experiments could not explain the diminished ER stress response  
4 observed in CCT $\alpha$ -null BMDMs in response to palmitate, we performed global  
5 lipidomic analysis of CCT $\alpha$ -null and control BMDMs. As described previously (Tian et  
6 al., 2008), total quantities of PC and PE in macrophages were unaffected by *Pcyt1a*  
7 deletion (Figure 6-figure supplement 1a). Unexpectedly, CCT $\alpha$ -null macrophages  
8 showed an enrichment in PUFA-containing PC levels compared to controls (Figure  
9 6a). Consistent with such observation, the expression of sterol regulatory element-  
10 binding protein 1 (SREBP1) target genes, which are known to be downregulated by  
11 high levels of PUFA-containing PLs in the ER (Hagen et al., 2010), was lower in CCT $\alpha$ -  
12 null macrophages than controls (Figure 6-figure supplement 2). Furthermore, changes  
13 in PE composition were similar to qualitative PC changes in CCT $\alpha$ -null and control  
14 cells (Figure 6-figure supplement 1b), indicating that reducing *de novo* PC  
15 biosynthesis rate promotes PUFA accumulation in membrane PLs.

16

17 We observed similar levels of saturated PC species between CCT $\alpha$ -null and control  
18 BMDMs under basal conditions (Figure 6b). Interestingly, the increased abundance of  
19 PUFA-containing PCs in CCT $\alpha$ -null BMDMs was at the expense of decreased mono-  
20 and diunsaturated PC species (Figure 6a-b). We confirmed these findings by  
21 analysing total BMDM fatty acid composition, which showed increased relative  
22 abundance of arachidonic (20:4n6), docosapentaenoic (22:5n6) and docosahexanoic  
23 acids (22:6n3), while palmitoleic and oleic acid levels were reduced in CCT $\alpha$ -null cells  
24 compared to controls (Figure 6c).

25

1 As expected, palmitate treatment caused a large increase in the abundance of  
2 saturated PC species in BMDMs (Figure 6-figure supplement 3b). Interestingly, in  
3 palmitate-treated macrophages, PC saturation was increased mostly at the expense  
4 of reduced mono- and diunsaturated PCs, while the proportion of 3 or more double  
5 bond-containing PC species was largely unaffected by palmitate treatment (Figure 6b  
6 and figure supplement 3b). Consequently, CCT $\alpha$ -null BMDMs showed higher  
7 membrane PUFA levels than controls even after prolonged treatment with palmitate,  
8 leading to diminished palmitate-induced PC saturation (Figures 6b and figure  
9 supplement 4). Prolonged palmitate treatment elevated PC:PE ratio to a similar extent  
10 in both CCT $\alpha$ -null and control BMDMs, suggesting that changes in total PC levels or  
11 PC:PE ratio were unlikely to explain differences in ER stress response between  
12 genotypes (Figure 6-figure supplement 3a).

13  
14 Our lipidomics analysis demonstrated that reduced CCT $\alpha$  activity could affect the  
15 levels of fatty acids other than palmitate and specifically resulted in the preferential  
16 accumulation of long chain PUFAs. These results were consistent with increased  
17 remodelling of PCs, most likely by LPCAT3. Furthermore, our lipid analysis also  
18 suggested an explanation for the lower ER stress in response to palmitate.  
19 Considerable literature has demonstrated that increased PUFA content in cellular  
20 membranes is protective against palmitate induced ER stress (Rong et al., 2013; Yang  
21 et al., 2011), suggesting a mechanistic explanation for the protective effects of *Pcyt1a*  
22 deletion against palmitate toxicity.

23  
24 In order to experimentally demonstrate that CCT $\alpha$ -null macrophages exhibited lower  
25 ER stress in response to palmitate due to qualitative changes in membrane PL

1 composition, we performed a rescue experiment of palmitate-treated BMDMs using  
2 exogenous arachidonic acid. Compared to palmitate treatment alone, 10:1 molar  
3 mixture of palmitate and arachidonate reduced *Tnf* and ER stress marker gene  
4 expression to the same basal level in both CCT $\alpha$ -null and control BMDMs (Figure 6d),  
5 suggesting that elevated PUFA levels negate the inflammatory effects of palmitate in  
6 macrophages lacking *Pcyt1a*. Overall, our results were consistent with a loss of *Pcyt1a*  
7 resulting in a shift to a PUFA-rich membrane fatty acid composition that was protective  
8 against exogenous palmitate.

1 **Figure 6** with 4 supplements

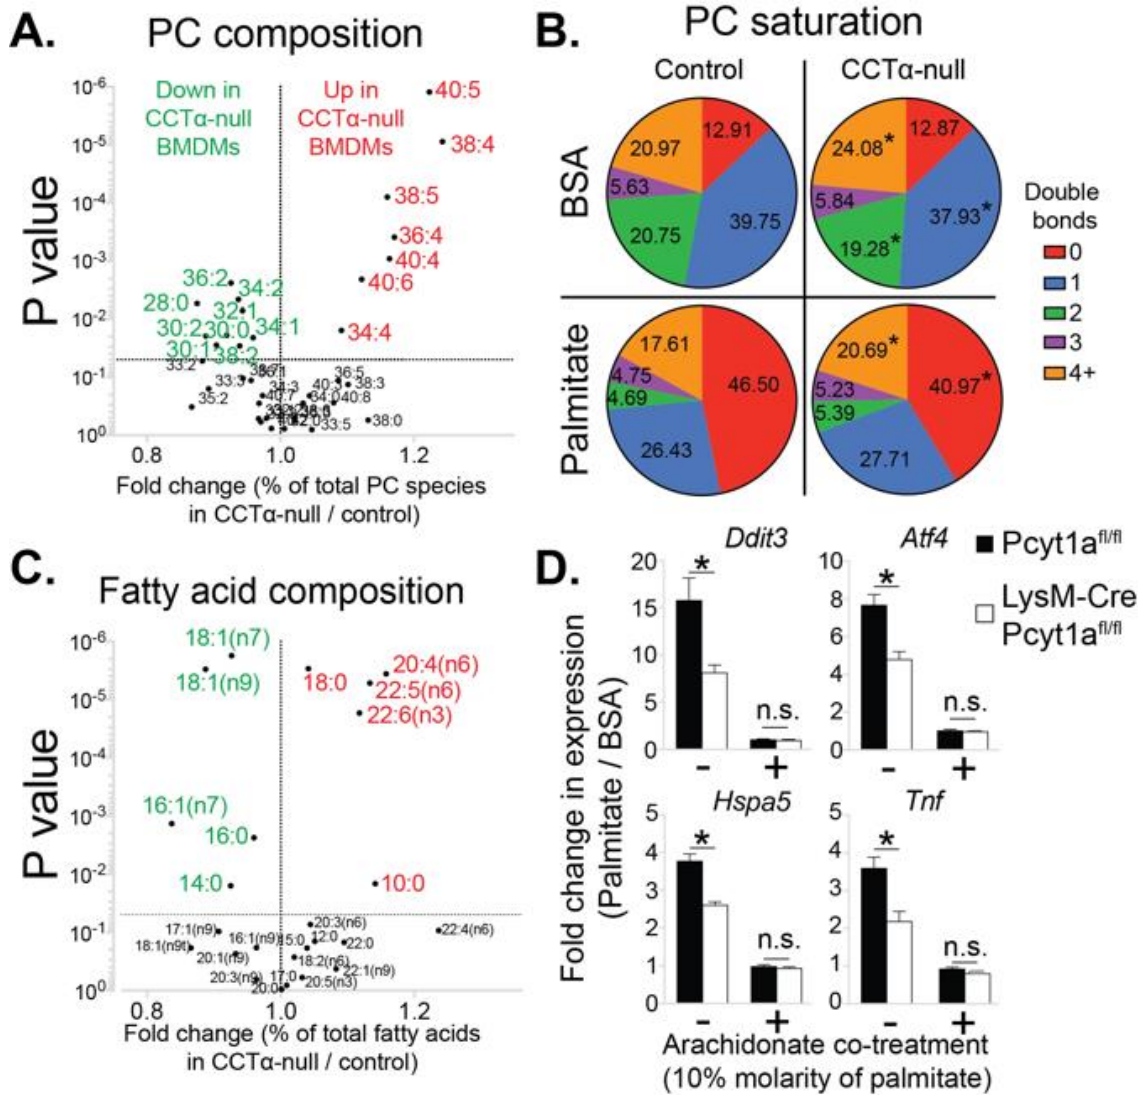

- 2  
3 **Pcyt1a deficiency increases PUFA-containing PC levels in macrophages.**  
4 (A) Volcano plot of indicated PC species, expressed as molar percentage of all measured PCs, in  
5 Pcyt1a<sup>fl/fl</sup> (n=7) or Pcyt1a<sup>fl/fl</sup> LysM-Cre (n=8) BMDMs.  
6 (B) Pie charts indicating the relative abundance of PC species with different degrees of unsaturation in  
7 Pcyt1a<sup>fl/fl</sup> (n=7) or Pcyt1a<sup>fl/fl</sup> LysM-Cre (n=8) BMDMs in a basal state or after 16 hour treatment with 250  
8 μM palmitate.  
9 (C) Volcano plot of indicated fatty acid species, expressed as molar percentage of all measured fatty  
10 acids, in Pcyt1a<sup>fl/fl</sup> (n=7) or Pcyt1a<sup>fl/fl</sup> LysM-Cre (n=8) BMDMs.  
11 (D) Fold induction (compared to BSA alone) of indicated ER stress marker gene and *Tnf* expression in  
12 Pcyt1a<sup>fl/fl</sup> (n=4) or Pcyt1a<sup>fl/fl</sup> LysM-Cre (n=4) BMDMs after 16-hour treatment with 250 μM palmitate,  
13 supplemented with or without 25 μM arachidonate.  
14 \*p < 0.05 between genotypes, error bars indicate SEM.

1 **Figure 6-figure supplement 1**

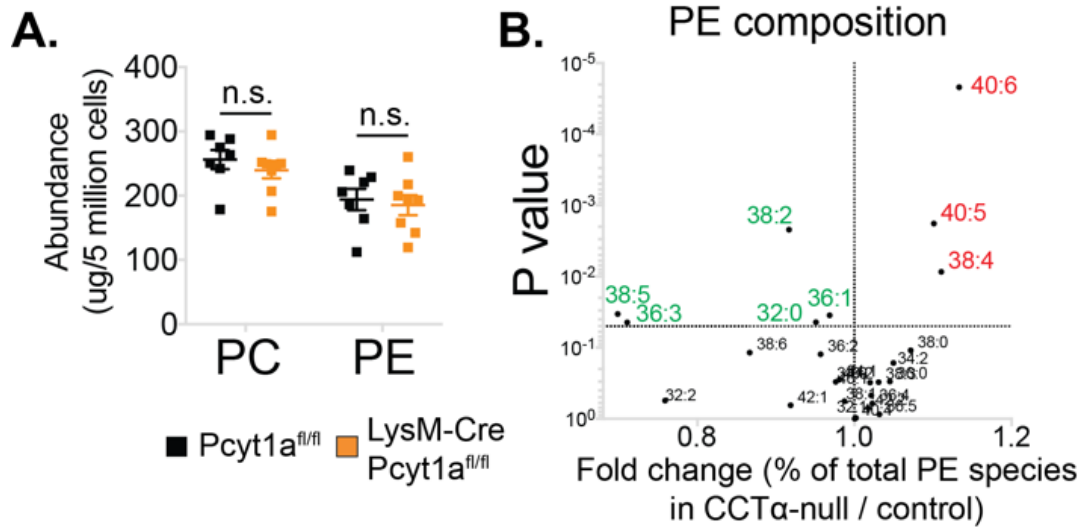

2 **The effects of *Pcyt1a* deficiency on total PC and PE levels and PE composition in macrophages.**

3 (A) Abundance of all detected PC and PE species in Pcyt1a<sup>fl/fl</sup> (n=7) or Pcyt1a<sup>fl/fl</sup> LysM-Cre (n=8)  
 4 BMDMs in a basal state. Error bars indicate SEM.

5 (B) Volcano plot of indicated PE species, expressed as molar percentage of all measured PEs, in  
 6 Pcyt1a<sup>fl/fl</sup> (n=7) or Pcyt1a<sup>fl/fl</sup> LysM-Cre (n=8) BMDMs in a basal state.

7  
 8  
 9  
 10 **Figure 6-figure supplement 2**

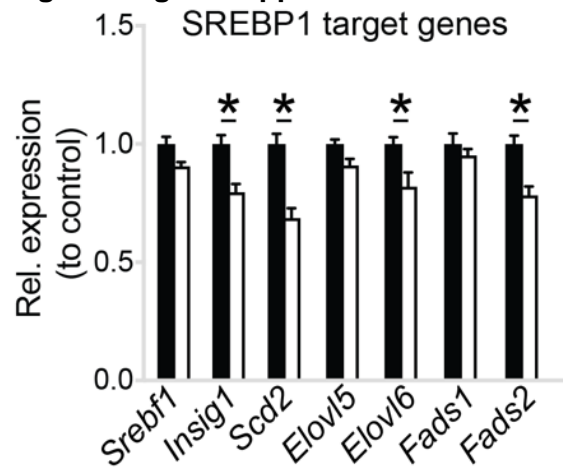

11 ***Pcyt1a* deficiency reduces SREBP1 target gene expression in macrophages.**

12 Normalised expression of SREBP1 target genes in Pcyt1a<sup>fl/fl</sup> (n=7, black bars) or Pcyt1a<sup>fl/fl</sup> LysM-Cre  
 13 (n=8, white bars) BMDMs in a basal state. \*p < 0.05 between genotypes, error bars indicate SEM.

1 **Figure 6-figure supplement 3**

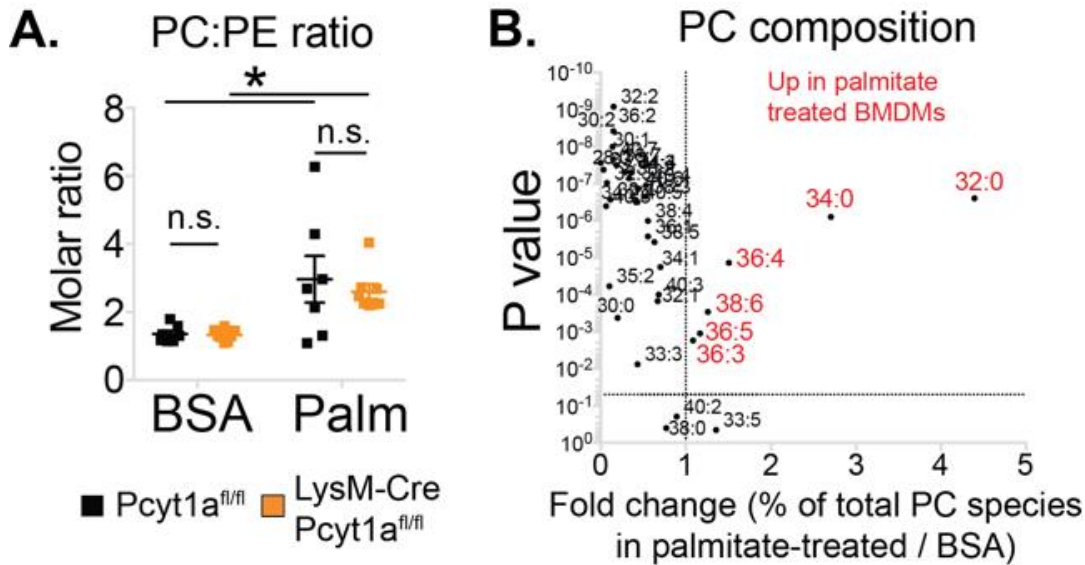

2 **The effects of palmitate treatment on PC to PE ratio and PC composition in macrophages.**

3 (A) PC to PE molar ratio in *Pcyt1a<sup>fl/fl</sup>* (n=7) or *Pcyt1a<sup>fl/fl</sup> LysM-Cre* (n=8) BMDMs in a basal state or after  
 4 16-hour treatment with 250  $\mu$ M palmitate. \*p < 0.05 between treatments, error bars indicate SEM.  
 5 (B) Volcano plot of indicated PC species, expressed as molar percentage of all measured PCs, in  
 6 *Pcyt1a<sup>fl/fl</sup>* (n=7) BMDMs treated with BSA or 250  $\mu$ M palmitate for 16 hours.  
 7  
 8  
 9

10 **Figure 6-figure supplement 4**

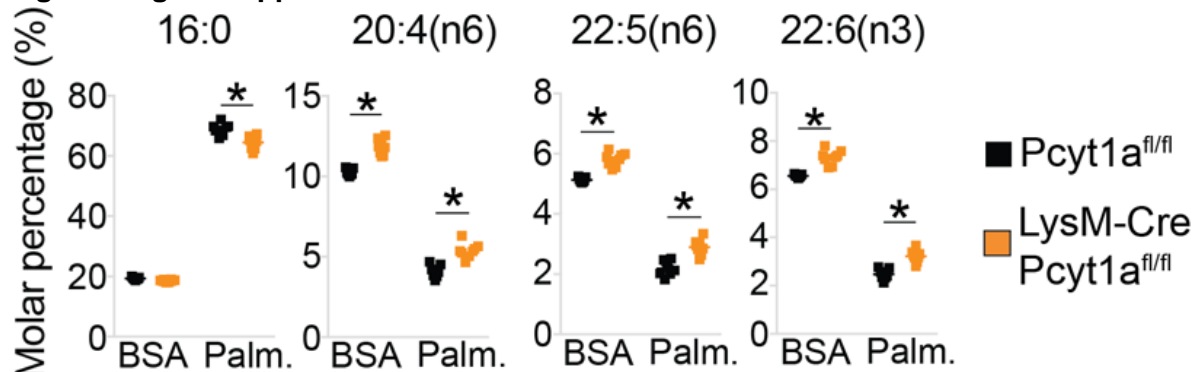

11 ***Pcyt1a* deficiency increases total PUFA levels in macrophages.**

12 Relative abundance of indicated fatty acids in *Pcyt1a<sup>fl/fl</sup>* (n=7) or *Pcyt1a<sup>fl/fl</sup> LysM-Cre* (n=8) BMDMs in a  
 13 basal state or after 16-hour treatment with 250  $\mu$ M palmitate. \*p < 0.05 between genotypes, error bars  
 14 indicate SEM.  
 15

## 1 **Reduced PC turnover promotes membrane PUFA accumulation in *Pcyt1a*-** 2 **deficient macrophages**

3 Finally, we set out to explain how reduced CCT $\alpha$  activity could lead to an alteration in  
4 the fatty acid composition of PC. Our hypothesis was that the increased half-life of  
5 membrane PCs in CCT $\alpha$ -null macrophages might allow more time for PCs to be  
6 remodelled to contain PUFAs via the Lands cycle. CCT $\alpha$ -null macrophages have  
7 previously been shown to have reduced PC turnover rates without changes in total PC  
8 levels (Tian et al., 2008) and our experimental findings confirmed these results, as we  
9 have observed reduced *de novo* PC synthesis rate and unchanged PC abundance in  
10 CCT $\alpha$ -null BMDMs compared to controls (Figure 2-figure supplement 1d and Figure  
11 6-figure supplement 1a).

12  
13 We next sought to confirm that the increased levels of PUFAs in CCT $\alpha$ -null  
14 macrophages were due to a lower turnover of PC. To do so, we performed a pulse-  
15 chase experiment using  $^3\text{H}$ -arachidonic acid. Indeed, CCT $\alpha$ -null BMDMs had  
16 increased retention of arachidonic acid in their membranes compared to control cells  
17 (Figure 7a). Overall, our results showed that the rate of PC turnover in macrophages  
18 is negatively associated with PUFA retention in PLs.

19  
20 Importantly, while the data from *Pcyt1a*-deficient models demonstrated lower PC  
21 turnover, increased levels of long-chain PUFAs and lower PUFA turnover rates, this  
22 data came from congenic models lacking *Pcyt1a*. To exclude this being a phenomenon  
23 unique to genetically manipulating *Pcyt1a*, we sought to manipulate PC turnover rates  
24 via an alternative route. To do so, we pharmacologically blocked PC hydrolysis by  
25 inhibiting phospholipase D activity using 1-butanol. In accordance to our hypothesis,



1 reducing PC turnover by inhibiting PC conversion to phosphatidic acid phenocopied  
 2 the effects of genetically reduced CCT $\alpha$  activity on cellular membrane fatty acid  
 3 composition (Figure 7b).

4

5 **Figure 7** with no supplements

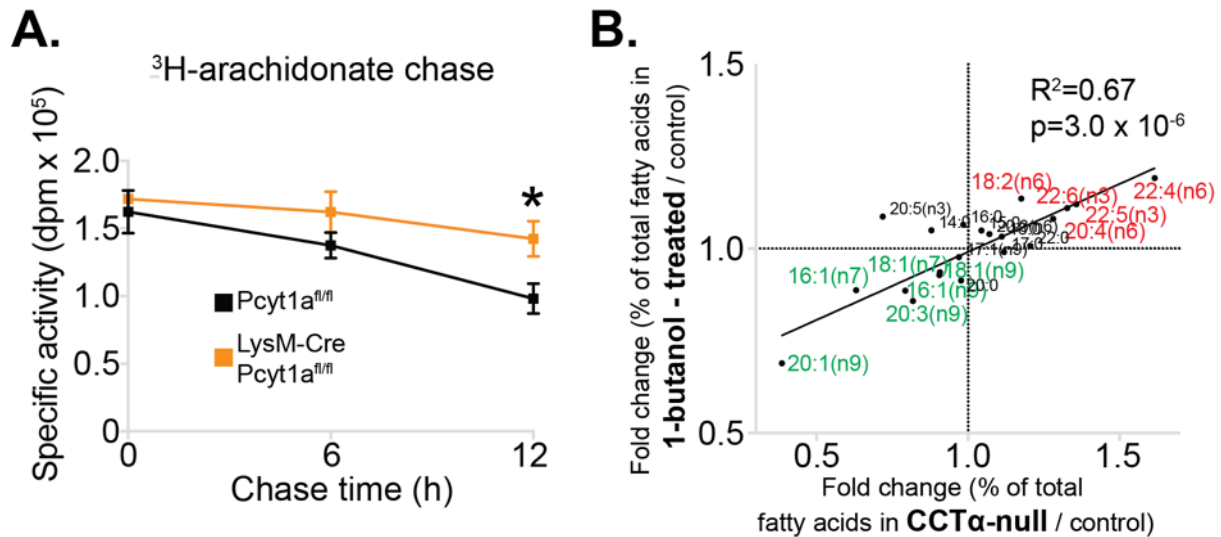

6

7 **Reduced PC turnover increases membrane PUFA levels in macrophages.**

8 (A) <sup>3</sup>H-arachidonate levels in Pcyt1a<sup>fl/fl</sup> (n=4) or Pcyt1a<sup>fl/fl</sup> LysM-Cre (n=4) BMDMs, pulsed with tracer  
 9 amounts of <sup>3</sup>H-arachidonate for 16 hours and chased with medium for indicated periods of time. \*p <  
 10 0.05 between genotypes, error bars indicate SEM.

11 (B) Linear regression analysis of the correlation between fold changes in the molar fatty acid percentage  
 12 induced by genetic *Pcyt1a* deletion (n=4) and by PLD inhibition using 15  $\mu$ M 1-butanol for 24 hours  
 13 (n=4).

## 1 Discussion

2 Here, we demonstrate for the first time that obesity is characterised by an increase in  
3 *de novo* PC synthesis pathway in ATMs. We show that the increase in ATM *de novo*  
4 PC biosynthesis during obesity is pathophysiologically relevant using a macrophage-  
5 specific genetic model of reduced CCT $\alpha$  activity. Reducing *de novo* PC synthesis rate  
6 in ATMs alleviates obesity-induced WAT inflammation and improves systemic glucose  
7 metabolism. Mechanistically, we show that decreasing CCT $\alpha$  activity in macrophages  
8 does not reduce PC levels, but instead leads to a compensatory reduction in PC  
9 degradation and maintenance of normal PC levels. Because of this reduced PC  
10 turnover, more time is afforded for PC remodelling enzymes to act on PCs, leading to  
11 an increase in PUFA-containing PC species that are protective against ER stress in  
12 response to palmitate. Our results reveal a novel relationship between the regulation  
13 of *de novo* PC synthesis, PC turnover and membrane fluidity.

14  
15 Our study highlights the importance of CCT $\alpha$  in mediating SFA-induced lipotoxicity in  
16 macrophages. Two recent independent reports have suggested that *de novo* PC  
17 synthesis is responsible for exogenous palmitate incorporation into membrane PCs  
18 (Gianfrancesco et al., 2019; Robblee et al., 2016). Robblee *et al.* based their  
19 conclusions on data obtained from pharmacologically inhibiting CCT $\alpha$  using  
20 miltefosine at a dose of 100  $\mu$ M, which inhibits *de novo* PC synthesis rate to a level  
21 that also leads to a reduction in exogenous palmitate incorporation, a result we  
22 reproduce here (Figure 5C). However, lower doses of miltefosine reduce *de novo* PC  
23 synthesis rate without affecting palmitate incorporation into cell membranes. At 25  $\mu$ M  
24 mitefosine, we detect a 30% reduction in *de novo* PC synthesis rate with no reduction  
25 in palmitate incorporation, which phenocopies our genetic model of *Pcyt1a* deficiency

1 in BMDMs. Importantly, our data show that a 30% reduction in *de novo* PC synthesis  
2 rate is sufficient to ameliorate ER stress, highlighting the capacity for changes in PC  
3 biosynthetic rate to regulate ER stress in a manner that does not require changes in  
4 palmitate incorporation. In this publication, we describe such mechanism; that of  
5 reduced CCT $\alpha$  activity leading to increased PC half-life and thus permitting the  
6 establishment of a membrane composition that is protective against palmitate-induced  
7 ER stress. Similarly, Gianfrancesco *et al* have utilised siRNA-mediated *PCYT1A*  
8 knockdown in cultured human macrophages to achieve approximately 50% reduction  
9 in *de novo* PC synthesis rate and demonstrated that it reduces SFA-induced  
10 inflammation. Due to a lack of tracer experiment in their study, we believe that reduced  
11 inflammation in their *PCYT1A* knockdown model is due to increased membrane PUFA  
12 content, as our experimental findings demonstrate that at 50  $\mu$ M miltefosine, we detect  
13 a 50% reduction in *de novo* PC synthesis rate with no significant reduction in palmitate  
14 incorporation.

15  
16 Further support for a role of PC turnover in regulating ER stress comes from recent  
17 work investigating TLR4 signalling. It has recently been shown that palmitate is not a  
18 direct TLR4 agonist, but instead requires TLR4 activation-induced changes in  
19 intracellular metabolism in order to promote ER stress and inflammation in  
20 macrophages (Lancaster *et al.*, 2018). Importantly, it has previously been  
21 demonstrated that TLR4 activation increases the rate of *de novo* PC synthesis and  
22 PC turnover in macrophages in order to provide a supply of new membranes for  
23 secretory vesicle formation in Golgi apparatus (Sanchez-Lopez *et al.*, 2019; Snider *et*  
24 *al.*, 2018; Tian *et al.*, 2008). As such, our findings are in line with a mechanism in which  
25 basal TLR4 activation increases sensitivity of cells to palmitate-induced toxicity by

1 increasing PC turnover. In support of this concept, we demonstrate that decreasing  
2 *de novo* PC synthesis protects macrophages from palmitate-driven ER stress and  
3 inflammation. Furthermore, two recent reports have demonstrated that TLR4  
4 activation in macrophages increases the transcription of *Slc44a1*, encoding choline  
5 transporter CTL1 (Sanchez-Lopez et al., 2019; Snider et al., 2018). As we observed  
6 increased *Slc44a1* transcript levels in ob/ob ATMs compared to controls, in future it  
7 will be of interest to investigate whether the increase in *Pcyt1a* transcript in ATMs  
8 isolated from obese mouse and human WAT is dependent on TLR4 activation.

9

10 While ATMs undergo pro-inflammatory activation during obesity, liver macrophages  
11 do not (Morgantini et al., 2019). It is likely that for this reason we observed an  
12 increased *de novo* PC synthesis pathway activity in ATMs, but not in liver  
13 macrophages isolated from ob/ob mice. While speculative, the absence of pro-  
14 inflammatory activation and normal *de novo* PC synthesis rate in liver macrophages  
15 could explain why hepatic genes related to metabolism and inflammation were  
16 comparable between CCT $\alpha$ -null ob/ob BMT and control mice.

17

18 Finally, inactivating mutations in *PCYT1A* gene have been linked to several human  
19 pathologies, including retinal dystrophy, spondylometaphyseal dysplasia and  
20 lipodystrophy (Hoover-Fong et al., 2014; Payne et al., 2014; Yamamoto et al., 2014).  
21 Our results suggest that besides controlling the production of bulk cellular PC mass,  
22 CCT $\alpha$  activity can affect the fatty acid composition of cell membranes by regulating  
23 their turnover, thus potentially explaining why homozygous *PCYT1A* mutations  
24 manifest in specific tissue disorders, and not in a systemic failure of proliferating cells.

## 1 Materials and methods

2

## 3 Key resources table

| REAGENT or RESOURCE                                       | SOURCE          | IDENTIFIER                    |
|-----------------------------------------------------------|-----------------|-------------------------------|
| <b>Antibodies</b>                                         |                 |                               |
| anti-CD45                                                 | BD Biosciences  | 564279, RRID:AB_2651134       |
| anti-CD11b                                                | BD Biosciences  | 564443, RRID:AB_2722548       |
| anti-SiglecF                                              | BD Biosciences  | 562757, RRID:AB_2687994       |
| anti-F4/80                                                | BioLegend       | 123116, RRID:AB_893481        |
| Anti-F4/80 (IHC)                                          | Bio-Rad         | Cl:A3-1, RRID:AB_1102558      |
| anti-CD206                                                | BioLegend       | 141723, RRID:AB_2562445       |
| anti-CD11c                                                | BioLegend       | 117336, RRID:AB_2565268       |
| anti-Ly6G                                                 | BioLegend       | 127608, RRID:AB_1186099       |
| anti-CD301                                                | BioLegend       | 145704, RRID:AB_2561961       |
| anti-CCTa                                                 | Abcam           | ab109263,<br>RRID:AB_10859965 |
| anti-beta Actin                                           | Abcam           | ab8227, RRID:AB_2305186       |
| anti-P-Thr183/Tyr185 JNK                                  | Cell signalling | 9251, RRID:AB_331659          |
| anti-JNK                                                  | Cell signalling | 9252, RRID:AB_2250373         |
| anti-P-Thr180/Tyr182 p38 MAPK                             | Cell signalling | 4511L, RRID:AB_2139679        |
| anti-p38 MAPK                                             | Cell signalling | 9212, RRID:AB_330713          |
| Anti-P-Ser473 AKT                                         | Cell signalling | 4060, RRID:AB_2315049         |
| Anti-P-Thr308 AKT                                         | Cell signalling | 9275, RRID:AB_329828          |
| Anti-pan AKT                                              | Cell signalling | 9272, RRID:AB_329827          |
| <b>Chemicals, Peptides, and Recombinant Proteins</b>      |                 |                               |
| Insulin                                                   | Novo Nordisk    | EU/1/02/230/003               |
| STAT 60                                                   | AMS Biotech     | CS-502                        |
| Reverse Transcriptase M-MLV                               | Promega         | M170b                         |
| M-MLV RT 5x buffer                                        | Promega         | M351A                         |
| MgCl <sub>2</sub> 25mM                                    | Promega         | A351B                         |
| Random Primers                                            | Promega         | C118A                         |
| dNTP Mix 10 mM                                            | Promega         | U151B                         |
| Chloroform                                                | Sigma           | 34854                         |
| Methanol                                                  | Sigma           | 34860                         |
| BF <sub>3</sub> Methanol                                  | Sigma           | B1127                         |
| Hexane                                                    | Sigma           | 34859                         |
| Ammonium formate                                          | Sigma           | 516961                        |
| Acetonitrile                                              | VWR             | 83640.320                     |
| 1-butanol                                                 | Sigma           | 281549                        |
| Miltefosine                                               | Sigma           | M5571                         |
| Arachidonic acid                                          | Cayman          | 90010                         |
| Palmitic acid                                             | Cayman          | 1000627                       |
| [1- <sup>14</sup> C]- palmitic acid                       | Perkin Elmer    | NEC075H050UC                  |
| [1,2- <sup>14</sup> C]- acetic acid, sodium salt          | Perkin Elmer    | NEC553250UC                   |
| Methyl-[ <sup>3</sup> H]- choline chloride                | Perkin Elmer    | NET109250UC                   |
| [5,6,8,9,11,12,14,15- <sup>3</sup> H(N)]-arachidonic acid | Perkin Elmer    | NET298Z050UC                  |
| Bovine Serum Albumin                                      | Sigma           | A8806                         |

|                                                                         |                                                                                   |                                 |
|-------------------------------------------------------------------------|-----------------------------------------------------------------------------------|---------------------------------|
| Hionic-Fluor scintillation liquid                                       | Perkin Elmer                                                                      | 6013319                         |
| Opti-Fluor scintillation liquid                                         | Perkin Elmer                                                                      | 6013199                         |
| Ethanol                                                                 | Sigma                                                                             | 459836                          |
| DAKO Real Peroxidase Blocking solution                                  | Agilent                                                                           | S2023                           |
| MOM ImmPress Polymer Reagent                                            | Vector                                                                            | MP-2400                         |
| DAB Peroxidase (HRP) Substrate Kit                                      | Vector                                                                            | SK-4100                         |
| Dako REAL Haematoxylin                                                  | Agilent                                                                           | S2020                           |
| <b>Critical Commercial Assays</b>                                       |                                                                                   |                                 |
| Alpha Trak 2 glucose meter                                              | Zoetis                                                                            | N/A                             |
| TruSeq Stranded mRNA Library Prep (96 Samples)                          | Illumina                                                                          | 20020595                        |
| Vybrant Phagocytosis Assay Kit                                          | Thermofisher                                                                      | V-6694                          |
| <b>Deposited Data</b>                                                   |                                                                                   |                                 |
| WT and ob/ob adipose tissue macrophage microarray                       | GEO: GSE36669                                                                     | Prieur <i>et al</i> , 2011      |
| <b>Experimental Models: Organisms/Strains</b>                           |                                                                                   |                                 |
| Mouse: ob/ob: B6.Cg-Lep <sup>ob</sup> /J                                | The Jackson Laboratory                                                            | 000632                          |
| Mouse: LysM-CRE: B6.129P2-Lyz2 <sup>tm1(cre)lfo</sup> /J                | Donated by Dr. Susan Jackowski                                                    | Clausen <i>et al</i> , 1999     |
| Mouse: Pcyt1a <sup>fl/fl</sup> : B6.129-Pcyt1a <sup>tm1lr</sup> /J      | Donated by Dr. Susan Jackowski                                                    | Zhang <i>et al</i> , 2000       |
| <b>Oligonucleotides</b>                                                 |                                                                                   |                                 |
| See Table S3 for the full list of qPCR primer sequences                 |                                                                                   |                                 |
| <b>Software and Algorithms</b>                                          |                                                                                   |                                 |
| Metabolizer algorithm                                                   | <a href="http://metabolizer.babelomics.org">http://metabolizer.babelomics.org</a> | Cubuk <i>et al</i> , 2018       |
| MassHunter Workstation Software Quantitative Analysis (Version B.07.00) | Agilent Technologies Inc                                                          | n/a                             |
| Thermo Xcalibur Quan browser integration software (Version 3.0)         | Thermofisher                                                                      | n/a                             |
| HALO AI                                                                 | Indica Labs                                                                       | n/a                             |
| TopHat (Version 2.0.11)                                                 |                                                                                   | (Kim <i>et al.</i> , 2013)      |
| EdgeR                                                                   |                                                                                   | (Robinson <i>et al.</i> , 2010) |
| HiPathia                                                                |                                                                                   | (Hidalgo <i>et al.</i> , 2017)  |

## 1 **Mice**

2 All animal protocols were conducted in accordance with the UK Home Office and  
3 Cambridge University ethical guidelines. Mice were housed 3-4 per cage in a  
4 temperature-controlled room (21°C) with a 12 h light/dark cycle, with 'lights on'  
5 corresponding to 6 am. Animals had *ad-libitum* access to food and water. A standard  
6 chow diet (DS-105, Safe Diets) was administered to all animals from weaning,  
7 consisting of 64.3% carbohydrate, 22.4% protein and 13.3% lipid of total calories. Only  
8 male mice were used for *in vivo* experiments. Male and female mice (8-20 weeks of  
9 age) were used for *in vitro* BMDM cultures.

10

## 11 **Generation of myeloid cell-specific CCT $\alpha$ KO mouse**

12 Macrophage-specific *Pcyt1a* knockout mouse (CCT $\alpha$  mKO) was generated by  
13 crossing a mouse model containing loxP sequences surrounding *Pcyt1a* alleles  
14 (*Pcyt1a*<sup>fl/fl</sup>) to the LysM-Cre (Clausen et al., 1999) mouse. *Pcyt1a*<sup>fl/fl</sup> mouse was  
15 generated by Prof. Ira Tabas and Dr. Susan Jackowski as described (Zhang et al.,  
16 2000), and was gifted to us on a mixed C57Bl/6J, 129/Sv genetic background by  
17 Dr. Suzanne Jackowski. *Pcyt1a*<sup>fl/fl</sup> and LysM-Cre lines were backcrossed to a  
18 C57Bl6/J genetic background using Marker-Assisted Accelerated Backcrossing  
19 (MAX-BAX, Charles River, UK) technology until SNP genotyping confirmed >99%  
20 background purity.

21

22 All experimental macrophage-specific knockout mice were produced by crossing  
23 LysM<sup>+/+</sup> with LysM<sup>+Cre</sup> animals on a floxed/floxed background, yielding a 1:1  
24 Mendelian ratio of control (floxed/floxed LysM<sup>+/+</sup>) to knockout (floxed/floxed LysM<sup>+Cre</sup>)  
25 offspring.

1

## 2 **Bone marrow transplant**

3 4-6-week-old WT or ob/ob host mice for bone marrow transplant were purchased from  
4 Jackson laboratories and were allowed to acclimatise for at least 2 weeks before the  
5 experiment. At 8 weeks of age, mice were split into two groups of equal average body  
6 weight and equal average fed blood glucose concentration (Respective BW and  
7 glucose values  $\pm$ SEM for control and CCT $\alpha$  mKO BMT: 47.1 $\pm$ 0.78 g and 46.8 $\pm$ 1.68 g,  
8  $p=0.87$ ; 27.9 $\pm$ 3.05mM and 24.4 $\pm$ 3.46mM,  $p=0.45$ ). All mice were given 1% Baytril  
9 antibiotic in drinking water a day before irradiation. All mice received two doses of 5.5  
10 Gy of radiation using Caesium 60 source. Two hours post irradiation, donor bone  
11 marrow cells (13 million/mouse) were injected into the tail veins of the irradiated mice.  
12 The cells from one donor mouse were used for up to 2 host mice. Host mice were then  
13 housed at 3-4/cage, with 1-2 mice carrying Pcyt1a<sup>fl/fl</sup> bone marrow and 1-2 - Pcyt1a<sup>fl/fl</sup>  
14 LysM-Cre bone marrow in each cage. Mice were kept on 1% Baytril for 1 month,  
15 monitored and weighed regularly until 12 weeks of age. A single ob/ob mouse carrying  
16 Pcyt1a<sup>fl/fl</sup> bone marrow had to be culled due to health reasons. Mice were then housed  
17 under standard housing conditions throughout the duration of the study.

18

## 19 **Cells**

### 20 **Culture and differentiation of bone-marrow derived macrophages**

21 Femur and tibia bones from mice were isolated and cleaned, and 10 ml of Roswell  
22 Park Memorial Institute Medium (RPMI)-1640 (Sigma) was flushed through each bone  
23 using a syringe. Bone marrow cells were counted manually, pelleted by centrifugation,  
24 and re suspended in RPMI-1640 with 20-30% L929 conditioned medium, 10% heat-  
25 inactivated FBS (Gibco, Thermofisher Scientific) and 100 U/ml penicillin- streptomycin



1 (Thermofisher Scientific) (macrophage differentiation medium). To differentiate into  
2 macrophages, cells were seeded in 10 cm non-culture treated plates (Falcon) at a  
3 density of  $5 \times 10^6$  cells per plate per 10 ml of macrophage differentiation medium and  
4 cultured for 7 days at 37 °C in 5% CO<sub>2</sub>. On day 5 of differentiation, medium was  
5 removed, and 10 ml of fresh macrophage differentiation medium was added to each  
6 plate. On day 7 of differentiation, macrophages were detached using ice-cold PBS  
7 containing 1 mM EDTA, counted using Countess automated cell counter  
8 (Thermofisher), centrifuged at 500 g, room temperature for 5 min and re suspended  
9 in macrophage differentiation medium at the concentration of  $5 \times 10^5$  cells/ml.  
10 Immediately after, cells were plated for experiments at the following densities: 500  
11  $\mu$ l/well of 24-well plate, 1 ml/well of 12-well plate, 2 ml/well of 6-well plate and 10 ml  
12 per 10 cm plate. Cells were incubated for at least 24 h after plating before conducting  
13 experiments.

14

15 To make L929 conditioned medium, L929 cells (CCL-1, ATCC) were seeded in DMEM  
16 supplemented with 10% heat-inactivated FBS, 100 U/ml penicillin-streptomycin and 2  
17 mM L-glutamine (Sigma) at a density of 500,000 cells per 50 ml of medium per T175  
18 tissue culture flask. Medium was harvested after 1 week of culture, and then 50 mL of  
19 fresh DMEM supplemented with 10% heat-inactivated FBS, 100 U/ml penicillin-  
20 streptomycin and 2 mM L-glutamine was added onto cells and harvested 1 week later.  
21 Batches obtained after the first and second weeks of culture were mixed at a 1:1 ratio,  
22 aliquoted and stored at -20 °C.

23

24 **Isolation and culture of peritoneal macrophages**

1 Immediately after sacrifice, 5 ml of PBS containing 3% FBS was injected into palpitante  
2 peritoneal cavity. As much liquid as possible was recovered, and the procedure was  
3 repeated two more times with fresh PBS containing 3% FBS. Pooled lavages were  
4 centrifuged at 400 g, 4 °C for 5 min. Cells were resuspended in 1 ml DMEM  
5 supplemented with 10% heat-inactivated FBS, 100 U/ml penicillin-streptomycin and 2  
6 mM L-glutamine (Sigma) and counted manually. The concentration was adjusted to  
7  $5 \times 10^5$  cells/ml, and cells were plated in 24-well plates with 500  $\mu$ l of cell  
8 suspension/well. Medium was changed after 6 hours, and cell stimulations were  
9 performed the following day.

10

### 11 **Isolation of liver macrophages**

12 Liver macrophages were isolated according to a previously published detailed method  
13 (Aparicio-Vergara et al., 2017). Briefly, livers of anesthetized mice were first perfused  
14 with calcium-free Hanks` balanced salt solution (HBSS), followed by collagenase  
15 digestion. After digestion, the hepatocytes were released by mechanical dissociation  
16 of the lobes and underwent several steps of filtration with calcium-containing HBSS  
17 and centrifugation at 50g for 3 min. The supernatant containing non-parenchymal cells  
18 was loaded on a Percoll gradient (25% and 50%) and centrifuged for 30 min, at 2300  
19 rpm, at 4°C. The interphase ring with enriched liver macrophages was collected. The  
20 cells were then plated for 30 min and washed twice before RNA was extracted for  
21 subsequent analyses.

22

### 23 **Human adipose tissue biopsies**

24 Subcutaneous adipose tissue biopsies were collected from 19 individuals undergoing  
25 bariatric bypass surgery, and adipose tissue macrophages were isolated. The

1 metabolic parameters of individuals have been published earlier (de Weijer et al.,  
2 2013). The isolation of macrophages from these adipose tissue biopsies has been  
3 described and presented earlier (Virtue et al., 2015).

4

## 5 **Methods**

### 6 **Glucose tolerance tests**

7 Mice were fasted for 16 h from 4 pm to 8 am. Mice were single-housed at least 1 h  
8 prior to being injected intraperitoneally with 1 mg/kg glucose. Blood samples for  
9 glucose measurement were taken at indicated times after the injection.

10

### 11 **Insulin tolerance tests**

12 Mice were fasted for 6 h from 8 am to 2 pm. Mice were single-housed at least 1 h prior  
13 to being injected intraperitoneally with 0.75 IU/kg of human insulin. Insulin dose of 2.5  
14 IU/kg was used for ob/ob mice. Blood samples for glucose measurement were taken  
15 at indicated times after the injection.

16

### 17 **Isolation of stromal-vascular fraction (SVF) from WAT**

18 Adipose tissues were removed after sacrifice, chopped thoroughly and resuspended  
19 in 10 ml digestion solution containing 7 ml Hanks' Balanced Salt Solution (HBSS,  
20 H9269, Sigma), 0.23 g bovine serum albumin (BSA, A8806, Sigma), and 20 mg  
21 collagenase type II (C6885, Sigma), filtered through 0.22  $\mu$ m membrane. The  
22 digestion was performed at 37°C for 20 min, with horizontal shaking at 100 rpm. The  
23 digestion mixture was then passed through a 100  $\mu$ m cell strainer (352360, Falcon)  
24 into a fresh tube and incubated at room temperature for 10 min, allowing the adipocyte  
25 fraction to layer on the surface. Adipocyte fraction was removed by pipetting. The

1 remaining solution was centrifuged at 400 g, 4°C for 5 min and pellet was re  
2 suspended in 1 ml of pre-cooled (at 4°C) FACS buffer (PBS, 1mM EDTA, 3% heat-  
3 inactivated FBS). Total SVF cell number was determined by Countess automated cell  
4 counter (Thermofisher).

5

## 6 **Flow cytometry**

7 SVF or BMDMs were collected and kept in FACS buffer (PBS, 1mM EDTA, 3% HI-  
8 FBS) on ice. Cell were stained with LIVE/DEAD (Invitrogen) and non-specific binding  
9 was blocked with 5 µg/ml anti-CD16/32. Cell surfaces were then stained with anti-  
10 CD45, anti-CD11b, anti-Siglec-F, anti-F4/80, anti-CD301, anti-CD206, anti-CD11c.  
11 Cells were gated within the live single cell population as CD45+/Ly6g-/SiglecF-  
12 /CD11b+/F4/80+ for ATMs. For BMDMs, median fluorescence for indicated markers  
13 was measured in live single cell population. Data were acquired on LSRFortessa (BD  
14 Biosciences) using FACS Diva software and analysed with TreeStar FlowJo (Version  
15 vX0.7).

16

## 17 **Phagocytosis**

18 Bacterial phagocytosis in BMDMs was measured by incubating cells for 2 hours with  
19 *E. coli* (K-12 strain) bacteria, labelled with the fluorescent dye fluorescein, according  
20 to manufacturer's protocol (Vybrant™ Phagocytosis Assay Kit, ThermoFisher).

21

## 22 **Cytokine secretion**

23 BMDMs were stimulated as indicated in figure legend. Culture supernatants were then  
24 collected, frozen on dry ice and stored at -80°C until the analysis. Mouse TNF and IL-

1 6 concentration in supernatants was determined using MesoScale Discovery V-PLEX  
2 assay platform, according to manufacturer's protocol.

3

#### 4 **Radioisotope labelling**

5 For radiolabelling experiments, radioisotope tracers were dissolved in macrophage  
6 differentiation medium at the following concentrations: 0.074 MBq/ml for methyl-[<sup>3</sup>H]  
7 choline chloride (for PC synthesis assays), 0.06 MBq/ml for [1-<sup>14</sup>C]-palmitic and [<sup>3</sup>H]-  
8 arachidonic acids, and 0.148 MBq/ml for [1-<sup>14</sup>C] acetic acid. BMDMs were plated at  
9 the standard densities in 24-well plates for PC synthesis and fatty acid  
10 incorporation/chase assays and in 6-well plates for lipid class analysis by thin-layer  
11 chromatography.

12

13 Radioactivity in total cells was determined by lysing cells in 100 µl of PBS containing  
14 1% Triton™ X-100, adding the lysate to scintillation vial containing 5 ml of Hionic-Fluor  
15 scintillation liquid and subjecting it to liquid scintillation counting (LSC).

16

#### 17 **Fatty acid treatments**

18 All fatty acid treatments were done using FFAs conjugated to BSA (fatty acid and  
19 endotoxin free, A8806, Sigma). The conjugation was performed by preparing a sterile-  
20 filtered 5% BSA solution in macrophage differentiation medium. Both 5% BSA medium  
21 and concentrated fatty acid solution (100 mM of fatty acid in ethanol) were heated at  
22 60°C before adding fatty acid solution dropwise into 5% BSA medium in order to make  
23 a medium containing 2.5 mM fatty acid and 5% BSA (approximately 10:3 fatty acid to  
24 BSA molar ratio). This medium was then sonicated until it became completely clear  
25 and used as a stock solution for stimulations on the same day without sterile filtering.

1 FFA-free BSA solution with equivalent amount of ethanol was used as a control. In  
2 dose-response experiments, the amount of BSA and ethanol in each condition was  
3 adjusted to the highest dose of palmitate. Unless otherwise indicated, fatty acid  
4 treatments were performed overnight for 16 hours.

5

## 6 **Extraction and quantification of RNA**

7 RNA from cells was extracted using RNeasy Plus Mini kit (74106, Qiagen) following  
8 manufacturers' instructions. 30  $\mu$ l of RNase-free water was used for elution.

9

10 RNA from tissues was harvested by adding 1 ml of RNA Stat-60 reagent (Tel Test) to  
11 approximately 100 mg of frozen tissue placed in a Lysing Matrix D tube (MP  
12 Biomedicals). Samples were homogenised using a FastPrep homogeniser (MP  
13 Biomedicals) for 2 x 45 s at 5.5 m/s and centrifuged at 14,000 g for 5 min to pellet  
14 debris. The aqueous phase was transferred to a fresh tube containing 200  $\mu$ l  
15 chloroform. Samples were mixed and centrifuged at 14,000 g, 4°C for 15 min. The  
16 clear upper phase containing RNA was removed and precipitated by mixing it with 500  
17  $\mu$ l isopropanol and incubating at room temperature for 10 min. Samples were  
18 centrifuged at 14,000 g, 4°C for 10 min and supernatants were discarded. RNA pellets  
19 were then washed with 70% ethanol, air-dried and re-suspended in 100  $\mu$ l of RNase-  
20 free water.

21

22 RNA concentration and purity were determined using Nanodrop ND-1000  
23 spectrophotometer (ThermoFisher Scientific). The absorbance was measured at 260  
24 nm against RNase-free water. A single A260 unit was assumed to be equal to 40  
25  $\mu$ g/mL of RNA. All RNA samples were stored at -80°C for subsequent processing.

1

## 2 **Quantitative real-time polymerase chain reaction (qRT-PCR)**

3 Complementary DNA (cDNA) was generated using Promega reagents in a 20  $\mu$ l  
4 reaction as follows: 500 ng RNA was added to 1 x M-MLV reverse transcriptase master  
5 mix (M351A) with 2.5 mM MgCl<sub>2</sub> (A351B), 1.25 mM dNTPs (U151B), and 5  $\mu$ g/mL  
6 random hexamers (C118A), and denatured at 65°C for 5 min before being transferred  
7 directly to ice in order to prevent the reassembly of the secondary structures of RNA.  
8 After the addition of 1  $\mu$ L of M-MLV reverse transcriptase (M170b), the reaction was  
9 incubated at 37°C for 1 h for cDNA synthesis and 95°C for 5 min for enzyme  
10 denaturation. cDNA was diluted 75-fold in RNase-free water and stored at -20°C.

11

12 qRT-PCR was performed in a 13  $\mu$ L reaction with 5  $\mu$ l of diluted cDNA, 6.5  $\mu$ l of 2x  
13 TaqMan or SYBR Green reagent (Applied Biosystems), 1.3  $\mu$ l of 3 mM forward and  
14 reverse primer mix (including 1.5 mM of probe for TaqMan reactions) and 0.2  $\mu$ l of  
15 RNase-free water according to the default manufacturer's protocol (Applied  
16 Biosystems). Primer sequences are described in Table S2. Reactions were run in  
17 duplicate for each sample and quantified using the ABI Prism 7900 sequence  
18 detection system (Applied Biosystems). Duplicates were checked for reproducibility,  
19 and then averaged; 'no reverse transcriptase' controls were included to check for  
20 genomic DNA contamination, and 'no template' controls were included to check for  
21 the formation of primer dimers. Product specificity was determined using a dissociation  
22 curve for SYBR green reactions. A standard curve generated from a pool of all cDNA  
23 samples was used for quantification. The expression of genes of interest was  
24 normalized using BestKeeper method to the geometric average of 3-4 housekeeping

1 genes (for mouse: *18s*, *36b4* and *Tbp*; for human: *Actb*, *B2m*, *Gapdh* and *Polr2a*), and  
2 data was expressed as arbitrary units or normalised to the average of control group.

3

#### 4 **Whole white adipose tissue RNA sequencing and analysis**

5 2  $\mu$ g of eWAT RNA was used to generate barcoded sequencing libraries using  
6 TruSeq® Stranded mRNA Library Preparation Kit (Illumina) following manufacturer's  
7 instructions. After adjusting for concentration, the sequencing libraries were combined  
8 into 96-plex pools. The pooled libraries were sequenced on 3 lanes of an Illumina  
9 HiSeq 4000 instrument at single-end 50bp (SE50), yielding an average of 15.7 million  
10 reads per sample. Library preparation was performed by the Genomics and  
11 Transcriptomic Core at the Institute of Metabolic Science. The sequencing was  
12 performed at the Genomics Core, Cancer Research UK Cambridge Institute.

13

14 RNA sequencing data was aligned using TopHat (V2.0.11) to the mouse GRCm38  
15 genome and genes were counted using HTseq-count (V0.8.0) by the Genomics and  
16 Transcriptomic Core at the Institute of Metabolic Science. Data normalisation and  
17 differential gene expression analysis was performed with edgeR using TMM and  
18 generalized linear model methods, respectively. Pathway activity analysis was  
19 performed using HiPathia algorithm.

20

#### 21 **Extraction of RNA, RNA sequencing and analysis of liver macrophages**

22 RNA extraction was performed using the TRIzol Reagent according to the  
23 manufacturer's instructions (15596018, ThermoFisher).

24



1 RNA libraries were prepared using TruSeq® Stranded mRNA kit (Illumina). The  
2 concentration of indexed libraries was quantified by RT-qPCR using the Universal  
3 Kapa Library Quantification Kit (KAPA Biosystems). Final libraries were normalized  
4 and sequenced on an Illumina HiSeq 2000 sequencer.

5  
6 Raw fastq-files were aligned against the murine genome version mm10 using TopHat  
7 (v2.0.13) with all default options. BAM files containing the alignment results were  
8 sorted according to the mapping position. mRNA quantification was performed using  
9 FeatureCounts from the Subread package against the GRCm38-gencode transcripts  
10 database version seven (gencode.vM7.annotation.gtf) and the GRCh38-gencode  
11 transcripts database version 24 (gencode.v24.annotation.gtf) to obtain read counts for  
12 each individual Ensembl gene. The read count table of the dataset was normalized  
13 separately using DESeq2.

14

### 15 **Protein extraction and quantification**

16 BMDMs were treated as described in legend, washed once with ice-cold PBS and  
17 lysed in ice-cold RIPA buffer (50 mM Tris-HCl, 150 mM NaCl, 1 mM EDTA, 0.1% SDS,  
18 0.5% sodium deoxycholate, 1% NP-40, pH 7.4) containing Pierce™ protease and  
19 phosphatase inhibitors (88668, Thermofisher Scientific). 150 µl of RIPA buffer was  
20 used to lyse 10<sup>6</sup> cells. Frozen white adipose tissue samples (approximately 50 mg)  
21 were ground in liquid nitrogen using mortar and pestle, and powdered tissue was then  
22 dissolved in 200 µl ice-cold RIPA buffer. Lysates were collected and centrifuged at  
23 14,000 g, 4°C for 10 min to remove cell debris.

24

1 Protein concentration was determined by DC Protein assay (5000111, Biorad)  
2 according to manufacturer's instructions.

3

#### 4 **Western blotting**

5 Protein lysates were diluted in NuPAGE™ LDS sample buffer (NP0007, Thermofisher  
6 Scientific) containing 2.5% 2-mercaptoethanol and boiled at 95°C for 5 min. 10 µg of  
7 protein was then separated by electrophoresis using NuPAGE™ SDS-polyacrylamide  
8 gels (Thermofisher Scientific) and transferred to nitrocellulose membranes using the  
9 iBlot® Dry Blotting System (Thermofisher Scientific). Membranes were blocked for 1  
10 h in 5% fat-free milk (Marvel) or 5% BSA in Tris-buffered saline containing 0.05%  
11 Tween (TBST) at room temperature and incubated overnight at 4°C with the  
12 appropriate primary antibody. Bound primary antibodies were detected using  
13 peroxidase-coupled secondary anti-rabbit antibody (7074, Cell signalling) and  
14 enhanced chemiluminescence (WBLUF0500, Millipore). Blots were exposed digitally  
15 using the ChemiDoc MP System (Bio-Rad), and bands were quantified using Image  
16 Lab™ software (Bio-Rad). The expression of proteins was normalised to a  
17 housekeeping protein ( $\beta$ -actin), and the phosphorylation status was determined by  
18 normalising to a respective total protein. All protein quantification data is expressed as  
19 arbitrary units.

20

#### 21 **Adipose tissue histology and imaging**

22 Adipose tissue samples for histology were placed in 10% formalin overnight, then  
23 transferred to 70% ethanol before embedding in paraffin. Different 4 µm sections were  
24 obtained from FFPE blocks and extra-coated with paraffin to preserve tissue integrity.

25

1 After incubating overnight at 37°C, sections were dewaxed using xylene and 100%  
2 industrial methylated spirits, then washed under running water for 5 min and kept in  
3 TBST. The sections were stained as follows: 1) blocking endogenous peroxidases for  
4 5 min (DAKO Real Peroxidase Blocking solution, S2023); 2) wash in TBST; 3) blocking  
5 using serum for 20 min; 4) primary anti-F4/80 antibody incubation for 60 min; 5) wash  
6 in TBST for 5 min; 6) 30 min incubation with MOM ImmPress Polymer Reagent (MP-  
7 2400); 7) wash in TBST; 8) DAB solution (5-10 minutes) prepared according to the  
8 manufacturer's instruction (DAB Peroxidase substrate kit, SK-4100); 9) wash in  
9 TBST; 10) 1 min incubation with Dako REAL Haematoxylin (S2020). The sections  
10 where then washed in tap water, dehydrated in graded alcohols, cleared in xylene and  
11 mounted.

12

13 All eWAT slides were scanned using a Zeiss Axio Scan Z1 and analysed using HALO  
14 software (Indica Labs, Corrales, NM). The 'tissue classifier module', utilising a state-  
15 of-the-art machine learning algorithm to identify tissue types based on colour, texture,  
16 and contextual features, was used to distinguish areas containing F4/80-positive cells  
17 (marked in dark green). 'Vacuole Quantification module' was then applied to analyse  
18 the adipocytes in dark green areas and in a whole section. Intact vacuoles completely  
19 surrounded by F4/80-positive cells were considered as CLS, while whole section  
20 vacuole analysis was used to determine average adipocyte area. The analyses were  
21 performed on the whole section to avoid selection bias; tissue edges were excluded  
22 using manual annotation. Halo was "trained-by-example" on randomly selected  
23 images, and then the analysis was extended on the whole batch of sections with HALO  
24 automated pipeline.

25

## 1 **Lipid extraction**

2 Total lipids from cells were extracted using a modified Folch extraction method. Glass  
3 pipettes were used throughout the procedure in order to avoid plastic-bound lipid  
4 contamination. 1 ml of HPLC-grade chloroform: methanol 2:1 v/v mixture was added  
5 to cell samples in a glass vial. Where applicable, appropriate amounts (calculated by  
6 approximating the average abundance of every fatty acid within the sample and adding  
7 matching amounts of standard) of 1,2-diundecanoyl-sn-glycero-3-phosphocholine  
8 (phospholipid standard, 850330C, Sigma) were included in extraction mixture as  
9 internal standard. Samples were homogenised by vortexing for 15 s. 200 µl of HPLC-  
10 grade water was added to each sample before vortexing for 2 min and centrifuging at  
11 4000 g for 10 min. 700 µl of the lower lipid fraction was transferred to a 7 ml glass  
12 tube. A second extraction was performed by adding 700 µl of fresh HPLC-grade  
13 chloroform followed by vortexing and centrifugation as above. 900 µl of lower lipid  
14 fraction was collected and pooled with the first 700µl fraction (total 1600 µl). Collected  
15 lipid fractions were dried under nitrogen stream. Dried lipids were stored at -20°C for  
16 subsequent processing, or resuspended in 100 µl chloroform, transferred to  
17 scintillation vials containing 5 ml of Opti-Fluor scintillation liquid (6013199, Perkin  
18 Elmer) and subjected to LSC.

19

## 20 **Thin-layer chromatography**

21 BMDMs were treated in 6-well plates as indicated in legend and lipids were labelled  
22 as described. Lipids from cells were extracted and solubilised in 50 µl of HPLC-grade  
23 chloroform. 20 µl of lipids were then spotted at the bottom of 20 cm x 20 cm thin layer  
24 chromatography (TLC) silica plates (Z292974, Sigma). TLC plates were placed into  
25 hermetic glass chambers containing 250 ml of 65:25:4 chloroform: methanol:

1 ammonium hydroxide v/v solution for phospholipid separation. Plates were allowed to  
2 develop until the solvent front was approximately 2 cm below the top of the plate.  
3 Plates were dried under laminar flow and incubated with radiographic films (47410,  
4 Fujifilm) in the dark for 1-3 days at room temperature. Radiographic films were  
5 developed using automated film developer and scanned. ImageJ software (NIH) was  
6 used to calculate the density of the bands on scanned radiograms.

7

### 8 **LC-MS lipid analysis**

9 To the previously dried lipid samples, 60  $\mu$ L of the lipid internal standard was added  
10 (methanol containing CE(18:0)<sub>d6</sub>, Ceramide(16:0)<sub>d31</sub>, FA(15:0)<sub>d29</sub>, LPC(14:0)<sub>d42</sub>,  
11 PA(34:1)<sub>d31</sub>, PC(34:1)<sub>d31</sub>, PE(34:1)<sub>d31</sub>, PG(34:1)<sub>d31</sub>, PI(34:1)<sub>d31</sub>, PS(16:0)<sub>d62</sub>,  
12 SM(16:0)<sub>d31</sub>, TG(45:0)<sub>d29</sub>, and TG(54:0)<sub>d35</sub>, all at 10  $\mu$ g/mL). The samples were then  
13 thoroughly vortexed, then dried under a gently stream of nitrogen. The samples were  
14 then reconstituted by adding 740  $\mu$ L of 4:1 mix of isopropanol and acetonitrile,  
15 respectively, and vortexed ensuring there was no undissolved material. The samples  
16 were then analysed by LC-MS analysis.

17

18 Chromatographic separation was achieved using Acquity UPLC CSH C18 (50 mm x  
19 2.1 mm, 1.7  $\mu$ m) LC column with a Shimadzu UPLC system (Shimadzu UK Limited,  
20 Wolverton, Milton Keynes). The column was maintained at 55 °C with a flow rate of  
21 0.5 mL/min. A binary mobile phase system was used with mobile phase A; 60:40  
22 acetonitrile to water, respectively, with 10 mM ammonium formate, and mobile phase  
23 B; 90:10 isopropanol to acetonitrile, respectively, with 10 mM ammonium formate. The  
24 gradient profile was as follows; at 0 minutes\_40% mobile phase B, at 0.4 minutes\_43%  
25 mobile phase B, at 0.45 minutes\_50% mobile phase B, at 2.4 minutes\_54% mobile

1 phase B, at 2.45 minutes\_70% mobile phase B, at 7 minutes\_99% mobile phase B, at  
2 8 minutes\_99% mobile phase B, at 8.3 minutes\_40% mobile phase B, at 10  
3 minutes\_40% mobile phase B.

4

5 Mass spectrometry detection was performed on an Exactive Orbitrap mass  
6 spectrometer (Thermo Scientific, Hemel Hempstead, UK) operating in  
7 positive/negative ion switching mode. Heated electrospray source was used, the  
8 sheath gas was set to 40 (arbitrary units), the aux gas set to 15 (arbitrary units) and  
9 the capillary temperature set to 300 °C. The instrument was operated in full scan mode  
10 from m/z 150–1200 Da.

11

12 Data processing was completed using Thermo Xcalibur Quan browser integration  
13 software (Thermo Scientific, Hemel Hempstead, UK). The identification of the lipid  
14 species was determined by an MS-signal for the corresponding theoretically  
15 calculated m/z accurate mass found at the expected retention time. The semi-  
16 quantitation of the lipids was calculated by the integration of the analyte MS-signal  
17 relative to the lipid class internal standard concentration.

18

### 19 **Quantitative analysis of fatty acid methyl esters (FAMES)**

20 In order to derive FFAs and esterified fatty acids from complex lipids into FAMES, 750  
21 µl of HPLC-grade chloroform: methanol 1:1 v/v solution was added to previously dried  
22 lipids in 7 ml glass vials. 125 µl of 10% boron trifluoride in methanol (134821, Sigma)  
23 was then added into each vial. Vials were sealed and incubated in an oven at 80°C  
24 for 90 min in order to hydrolyse fatty acid-glycerol and fatty acid-cholesterol ester  
25 bonds and form FAMES. Samples were allowed to cool, and 1 ml of HPLC-grade n-

1 Hexane and 500  $\mu$ l of HPLC-grade water were added. Samples were briefly vortexed  
2 and centrifuged at 2000 g using benchtop centrifuge. The upper organic layer was  
3 transferred into 2 ml gas chromatography glass vials and dried under nitrogen stream.  
4  
5 Gas chromatography-mass spectrometry was performed with Agilent 7890B gas  
6 chromatography system linked to Agilent 5977A mass spectrometer, using AS3000  
7 auto sampler. A TR-FAME column (length: 30 m, inter diameter: 0.25 mm, film size:  
8 0.25  $\mu$ m, 260M142P, Thermofisher Scientific) was used with helium as carrier gas.  
9 Inlet temperature was set at 230°C. Dried FAME samples were re-suspended in 100  
10  $\mu$ l HPLC-grade n-Hexane. 1  $\mu$ l of this solution was injected for analysis. The oven  
11 programme used for separation was as follows: 100°C hold for 2 min, ramp at  
12 25°C/min to 150°C, ramp at 2.5°C/min to 162°C and hold for 3.8 min, ramp at  
13 4.5°C/min to 173°C and hold for 5 min, ramp at 5°C/min to 210°C, ramp at 40°C/min  
14 to 230°C and hold for 0.5 min. Carrier gas flow was set to constant 1.5 ml/min. If the  
15 height of any FAME peaks exceeded  $10^8$  units, sample was re-injected with 10:1 –  
16 100:1 split ratio. Identification of FAME peaks was based on retention time and made  
17 by comparison with those in external standards (Food industry FAME mix, 35077,  
18 Restek).  
19  
20 Peak integration and quantification was performed using MassHunter Workstation  
21 Quantitative Analysis software (version B.07.00, Agilent). Specific high-abundance  
22 ions from total ion chromatogram were chosen to calculate each fatty acid peak. The  
23 values for each fatty acid were expressed in molar percentages by dividing the area  
24 of each peak by the sum of all peak areas for a given sample. This analysis accounted  
25 for differences in total lipid content between samples.

1

## 2 **Statistical analysis and graphical representation of data**

3 All data from experiments is represented as a mean, with error bars showing standard  
4 error of the mean and the number of replicates stated in legend. Some data is  
5 represented as a fold-change, and it is stated in legend to what value the data  
6 represented was normalised to generate the fold-change. A student's t-test was used  
7 to compare two groups; one-way analysis of variance (ANOVA) was used to compare  
8 more than 2 groups, followed by Bonferonni's post-hoc test. Where more than one  
9 factor influenced the variable being measured, 2-way ANOVA was used to test for a  
10 significant effect of each factor as well as an interaction between factors.

11

12 All statistical tests were performed and graphs were generated using GraphPad Prism  
13 6 software. Graphs and figures were edited for presentation using Adobe Illustrator  
14 CC 2015 software.

15

16 Metabolizer algorithm used to analyse microarray data can be accessed at  
17 <http://metabolizer.babelomics.org> and its methodology is presented in recent  
18 publications (Cubuk et al., 2018b; 2018a).



## 1 **Acknowledgements**

2 Pcyt1a<sup>fl/fl</sup> and LysM-Cre mice were a kind gift from Dr. Susan Jackowski. We thank  
3 Daniel Hart, Sarah Grocott, Charley Beresford, Jade Bacon, Laura McKinven, Eerika  
4 Rasijeff and Agnes Lukasik for their excellent technical assistance in the animal work.  
5 All animal work was carried out in the Disease Model Core (MRC Metabolic Diseases  
6 Unit [MRC\_MC\_UU\_12012/5]; Wellcome Trust Strategic Award [100574/Z/12/Z]). We  
7 also thank Brian Lam and Marcella Ma from the Genomics and Transcriptomics Core,  
8 James Warner from the Histology core and Gregory Strachan from the Imaging core  
9 for their technical assistance. All serum biochemistry and cytokine secretion analysis  
10 were conducted by the Biochemistry Assay Lab (MRC Metabolic Diseases Unit  
11 [MRC\_MC\_UU\_12012/5]). We thank the Wellcome Trust [102354/Z/13/Z], BHF  
12 [RG/18/7/33636], MRC [MC\_UU\_12012/2], Spanish Ministry of Economy and  
13 Competitiveness [SAF2017-88908-R], AstraZeneca through the ICMC (M.A.), the  
14 Swedish Research council (M.A.: 2015-03582) and the Strategic Research Program  
15 in Diabetes at Karolinska Institutet (M.A.) for funding this work. The research leading  
16 to these results has also received support from the Innovative Medicines Initiative Joint  
17 Undertaking under EMIF grant agreement n°115372, resources of which are  
18 composed of financial contribution from the European Union's Seventh Framework  
19 Programme (FP7/2007-2013) and EFPIA companies' in kind contribution.

20

## 21 **Author contributions**

22 K.P. and S.V. designed and conducted experiments and wrote the manuscript. G.B.  
23 conducted experiments. B.J. and A.K. conducted LC-MS lipid analysis. C.C. and J.D.  
24 performed bioinformatics analysis of transcriptomic data. C.M. and M.A. provided  
25 transcriptomic data and analysis of liver macrophages. M.S. provided human

- 1 adipose tissue samples and isolated ATMs. A.V.-P. supervised the study and wrote
- 2 the manuscript.
- 3
- 4 **Declaration of interests**
- 5 The authors declare no competing interests.

## 1 **References**

- 2 Aparicio-Vergara, M., Tencerova, M., Morgantini, C., Barreby, E., Aouadi, M., 2017.  
3 Isolation of Kupffer Cells and Hepatocytes from a Single Mouse Liver. *Methods Mol.*  
4 *Biol.* 1639, 161–171. doi:10.1007/978-1-4939-7163-3\_16
- 5 Ariyama, H., Kono, N., Matsuda, S., Inoue, T., Arai, H., 2010. Decrease in membrane  
6 phospholipid unsaturation induces unfolded protein response. *J. Biol. Chem.* 285,  
7 22027–22035. doi:10.1074/jbc.M110.126870
- 8 Clausen, B.E., Burkhardt, C., Reith, W., Renkawitz, R., Förster, I., 1999. Conditional  
9 gene targeting in macrophages and granulocytes using LysMcre mice. *Transgenic*  
10 *Res.* 8, 265–277.
- 11 Cubuk, C., Hidalgo, M.R., Amadoz, A., Pujana, M.A., Mateo, F., Herranz, C.,  
12 Carbonell-Caballero, J., Dopazo, J., 2018a. Gene expression integration into pathway  
13 modules reveals a pan-cancer metabolic landscape. *Cancer Res.* canres.2705.2017.  
14 doi:10.1158/0008-5472.CAN-17-2705
- 15 Cubuk, C., Hidalgo, M.R., Amadoz, A., Rian, K., Salavert, F., Pujana, M.A., Mateo, F.,  
16 Herranz, C., Caballero, J.C., Dopazo, J., 2018b. Differential metabolic activity and  
17 discovery of therapeutic targets using summarized metabolic pathway models. *bioRxiv*  
18 367334. doi:10.1101/367334
- 19 de Weijer, B.A., Aarts, E., Janssen, I.M.C., Berends, F.J., van de Laar, A., Kaasjager,  
20 K., Ackermans, M.T., Fliers, E., Serlie, M.J., 2013. Hepatic and peripheral insulin  
21 sensitivity do not improve 2 weeks after bariatric surgery. *Obesity* 21, 1143–1147.  
22 doi:10.1002/oby.20220
- 23 Ecker, J., Liebisch, G., Englmaier, M., Grandl, M., Robenek, H., Schmitz, G., 2010.  
24 Induction of fatty acid synthesis is a key requirement for phagocytic differentiation of  
25 human monocytes. *Proc. Natl. Acad. Sci. U.S.A.* 107, 7817–7822.  
26 doi:10.1073/pnas.0912059107
- 27 Fu, S., Yang, L., Li, P., Hofmann, O., Dicker, L., Hide, W., Lin, X., Watkins, S.M.,  
28 Ivanov, A.R., Hotamisligil, G.S., 2011. Aberrant lipid metabolism disrupts calcium  
29 homeostasis causing liver endoplasmic reticulum stress in obesity. *Nature* 473, 528–  
30 531. doi:10.1038/nature09968
- 31 Gianfrancesco, M.A., Dehairs, J., L'homme, L., Herinckx, G., Esser, N., Jansen, O.,  
32 Habraken, Y., Lassence, C., Swinnen, J.V., Rider, M.H., Piette, J., Paquot, N.,  
33 Legrand-Poels, S., 2019. Saturated fatty acids induce NLRP3 activation in human  
34 macrophages through K<sup>+</sup> efflux resulting from phospholipid saturation and Na, K-  
35 ATPase disruption. *Biochim Biophys Acta Mol Cell Biol Lipids.*  
36 doi:10.1016/j.bbalip.2019.04.001
- 37 Hagen, R.M., Rodriguez-Cuenca, S., Vidal-Puig, A., 2010. An allostatic control of  
38 membrane lipid composition by SREBP1. *FEBS Lett.* 584, 2689–2698.  
39 doi:10.1016/j.febslet.2010.04.004
- 40 Heng, T.S.P., Painter, M.W., Immunological Genome Project Consortium, 2008. The  
41 Immunological Genome Project: networks of gene expression in immune cells. *Nature*  
42 *Immunology* 9, 1091–1094. doi:10.1038/ni1008-1091
- 43 Hidalgo, M.R., Cubuk, C., Amadoz, A., Salavert, F., Carbonell-Caballero, J., Dopazo,  
44 J., 2017. High throughput estimation of functional cell activities reveals disease

- 1 mechanisms and predicts relevant clinical outcomes. *Oncotarget* 8, 5160–5178.  
2 doi:10.18632/oncotarget.14107
- 3 Holzer, R.G., Park, E.-J., Li, N., Tran, H., Chen, M., Choi, C., Solinas, G., Karin, M.,  
4 2011. Saturated fatty acids induce c-Src clustering within membrane subdomains,  
5 leading to JNK activation. *Cell* 147, 173–184. doi:10.1016/j.cell.2011.08.034
- 6 Hoover-Fong, J., Sobreira, N., Jurgens, J., Modaff, P., Blout, C., Moser, A., Kim, O.-  
7 H., Cho, T.-J., Cho, S.Y., Kim, S.J., Jin, D.-K., Kitoh, H., Park, W.-Y., Ling, H., Hetrick,  
8 K.N., Doheny, K.F., Valle, D., Pauli, R.M., 2014. Mutations in PCYT1A, encoding a  
9 key regulator of phosphatidylcholine metabolism, cause spondylometaphyseal  
10 dysplasia with cone-rod dystrophy. *Am. J. Hum. Genet.* 94, 105–112.  
11 doi:10.1016/j.ajhg.2013.11.018
- 12 Hotamisligil, G.S., 2017. Inflammation, metaflammation and immunometabolic  
13 disorders. *Nature* 542, 177–185. doi:10.1038/nature21363
- 14 Hou, N.S., Gutschmidt, A., Choi, D.Y., Pather, K., Shi, X., Watts, J.L., Hoppe, T.,  
15 Taubert, S., 2014. Activation of the endoplasmic reticulum unfolded protein response  
16 by lipid disequilibrium without disturbed proteostasis in vivo. *Proc. Natl. Acad. Sci.*  
17 U.S.A. 111, E2271–80. doi:10.1073/pnas.1318262111
- 18 Jackowski, S., Xu, X.X., Rock, C.O., 1997. Phosphatidylcholine signaling in response  
19 to CSF-1. *Mol. Reprod. Dev.* 46, 24–30. doi:10.1002/(SICI)1098-  
20 2795(199701)46:1<24::AID-MRD5>3.0.CO;2-T
- 21 Jiang, H., Li, Z., Huan, C., Jiang, X.-C., 2018. Macrophage Lysophosphatidylcholine  
22 Acyltransferase 3 Deficiency-Mediated Inflammation Is Not Sufficient to Induce  
23 Atherosclerosis in a Mouse Model. *Front Cardiovasc Med* 5, 192.  
24 doi:10.3389/fcvm.2018.00192
- 25 Kim, D., Perteza, G., Trapnell, C., Pimentel, H., Kelley, R., Salzberg, S.L., 2013.  
26 TopHat2: accurate alignment of transcriptomes in the presence of insertions, deletions  
27 and gene fusions. *Genome Biol.* 14. doi:10.1186/gb-2013-14-4-r36
- 28 Lancaster, G.I., Langley, K.G., Berglund, N.A., Kammoun, H.L., Reibe, S., Estevez,  
29 E., Weir, J., Mellett, N.A., Pernes, G., Conway, J.R.W., Lee, M.K.S., Timpson, P.,  
30 Murphy, A.J., Masters, S.L., Gerondakis, S., Bartonicek, N., Kaczorowski, D.C.,  
31 Dinger, M.E., Meikle, P.J., Bond, P.J., Febbraio, M.A., 2018. Evidence that TLR4 Is  
32 Not a Receptor for Saturated Fatty Acids but Mediates Lipid-Induced Inflammation by  
33 Reprogramming Macrophage Metabolism. *Cell Metab.* 27, 1096–1110.e5.  
34 doi:10.1016/j.cmet.2018.03.014
- 35 Morgantini, C., Jager, J., Li, X., Levi, L., Azzimato, V., Sulen, A., Barreby, E., Xu, C.,  
36 Tencerova, M., Näslund, E., Kumar, C., Verdeguer, F., Straniero, S., Hultenby, K.,  
37 Björkström, N.K., Ellis, E., Rydén, M., Kutter, C., Hurrell, T., Lauschke, V.M., Boucher,  
38 J., Tomčala, A., Krejčová, G., Bajgar, A., Aouadi, M., 2019. Liver macrophages  
39 regulate systemic metabolism through non-inflammatory factors. *Nature Metabolism*  
40 2019 3, 1. doi:10.1038/s42255-019-0044-9
- 41 Payne, F., Lim, K., Grousse, A., Brown, R.J., Kory, N., Robbins, A., Xue, Y., Sleigh,  
42 A., Cochran, E., Adams, C., Dev Borman, A., Russel-Jones, D., Gorden, P., Semple,  
43 R.K., Saudek, V., O'Rahilly, S., Walther, T.C., Barroso, I., Savage, D.B., 2014.  
44 Mutations disrupting the Kennedy phosphatidylcholine pathway in humans with  
45 congenital lipodystrophy and fatty liver disease. *Proc. Natl. Acad. Sci. U.S.A.* 111,  
46 8901–8906. doi:10.1073/pnas.1408523111

- 1 Prieur, X., Mok, C.Y.L., Velagapudi, V.R., Núñez, V., Fuentes, L., Montaner, D.,  
2 Ishikawa, K., Camacho, A., Barbarroja, N., O'Rahilly, S., Sethi, J.K., Dopazo, J.,  
3 Orešič, M., Ricote, M., Vidal-Puig, A., 2011. Differential lipid partitioning between  
4 adipocytes and tissue macrophages modulates macrophage lipotoxicity and M2/M1  
5 polarization in obese mice. *Diabetes* 60, 797–809. doi:10.2337/db10-0705
- 6 Ridgway, N.D., Lagace, T.A., 2003. Regulation of the CDP-choline pathway by sterol  
7 regulatory element binding proteins involves transcriptional and post-transcriptional  
8 mechanisms. *Biochem. J.* 372, 811–819. doi:10.1042/BJ20030252
- 9 Robblee, M.M., Kim, C.C., Abate, J.P., Valdearcos, M., Sandlund, K.L.M., Shenoy,  
10 M.K., Volmer, R., Iwawaki, T., Koliwad, S.K., 2016. Saturated Fatty Acids Engage an  
11 IRE1 $\alpha$ -Dependent Pathway to Activate the NLRP3 Inflammasome in Myeloid Cells.  
12 *Cell Reports* 14, 2611–2623. doi:10.1016/j.celrep.2016.02.053
- 13 Robinson, M.D., McCarthy, D.J., Smyth, G.K., 2010. edgeR: a Bioconductor package  
14 for differential expression analysis of digital gene expression data. *Bioinformatics* 26,  
15 139–140. doi:10.1093/bioinformatics/btp616
- 16 Rong, X., Albert, C.J., Hong, C., Duerr, M.A., Chamberlain, B.T., Tarling, E.J., Ito, A.,  
17 Gao, J., Wang, B., Edwards, P.A., Jung, M.E., Ford, D.A., Tontonoz, P., 2013. LXRs  
18 regulate ER stress and inflammation through dynamic modulation of membrane  
19 phospholipid composition. *Cell Metab.* 18, 685–697. doi:10.1016/j.cmet.2013.10.002
- 20 Sanchez-Lopez, E., Zhong, Z., Stubelius, A., Sweeney, S.R., Booshehri, L.M.,  
21 Antonucci, L., Liu-Bryan, R., Lodi, A., Terkeltaub, R., Lacal, J.C., Murphy, A.N.,  
22 Hoffman, H.M., Tiziani, S., Guma, M., Karin, M., 2019. Choline Uptake and Metabolism  
23 Modulate Macrophage IL-1 $\beta$ ; and IL-18 Production. *Cell Metab.* 1–29.  
24 doi:10.1016/j.cmet.2019.03.011
- 25 Shan, B., Wang, X., Wu, Y., Xu, C., Xia, Z., Dai, J., Shao, M., Zhao, F., He, S., Yang,  
26 L., Zhang, M., Nan, F., Li, J., Liu, J., Liu, J., Jia, W., Qiu, Y., Song, B., Han, J.-D.J.,  
27 Rui, L., Duan, S.-Z., Liu, Y., 2017. The metabolic ER stress sensor IRE1 $\alpha$  suppresses  
28 alternative activation of macrophages and impairs energy expenditure in obesity.  
29 *Nature Immunology* 18, 519–529. doi:10.1038/ni.3709
- 30 Shindou, H., Hishikawa, D., Harayama, T., Eto, M., Shimizu, T., 2013. Generation of  
31 membrane diversity by lysophospholipid acyltransferases. *J. Biochem.* 154, 21–28.  
32 doi:10.1093/jb/mvt048
- 33 Snider, S.A., Margison, K.D., Ghorbani, P., LeBlond, N.D., O'Dwyer, C., Nunes,  
34 J.R.C., Nguyen, T., Xu, H., Bennett, S.A.L., Fullerton, M.D., 2018. Choline transport  
35 links macrophage phospholipid metabolism and inflammation. *Journal of Biological*  
36 *Chemistry* 293, 11600–11611. doi:10.1074/jbc.RA118.003180
- 37 Suzuki, T., Gao, J., Ishigaki, Y., Kondo, K., Sawada, S., Izumi, T., Uno, K., Kaneko,  
38 K., Tsukita, S., Takahashi, K., Asao, A., Ishii, N., Imai, J., Yamada, T., Oyadomari, S.,  
39 Katagiri, H., 2017. ER Stress Protein CHOP Mediates Insulin Resistance by  
40 Modulating Adipose Tissue Macrophage Polarity. *CellReports* 18, 2045–2057.  
41 doi:10.1016/j.celrep.2017.01.076
- 42 Tian, Y., Pate, C., Andreolotti, A., Wang, L., Tuomanen, E., Boyd, K., Claro, E.,  
43 Jackowski, S., 2008. Cytokine secretion requires phosphatidylcholine synthesis. *The*  
44 *Journal of Cell Biology* 181, 945–957. doi:10.1083/jcb.200706152

- 1 Virtue, S., Masoodi, M., de Weijer, B.A.M., van Eijk, M., Mok, C.Y.L., Eiden, M., Dale,  
2 M., Pirraco, A., Serlie, M.J., Griffin, J.L., Vidal-Puig, A., 2015. Prostaglandin profiling  
3 reveals a role for haematopoietic prostaglandin D synthase in adipose tissue  
4 macrophage polarisation in mice and humans. *Int J Obes (Lond)* 39, 1151–1160.  
5 doi:10.1038/ijo.2015.34
- 6 Virtue, S., Vidal-Puig, A., 2010. Adipose tissue expandability, lipotoxicity and the  
7 Metabolic Syndrome--an allostatic perspective. *Biochim. Biophys. Acta* 1801, 338–  
8 349. doi:10.1016/j.bbali.2009.12.006
- 9 Volmer, R., van der Ploeg, K., Ron, D., 2013. Membrane lipid saturation activates  
10 endoplasmic reticulum unfolded protein response transducers through their  
11 transmembrane domains. *Proc. Natl. Acad. Sci. U.S.A.* 110, 4628–4633.  
12 doi:10.1073/pnas.1217611110
- 13 Wei, X., Song, H., Yin, L., Rizzo, M.G., Sidhu, R., Covey, D.F., Ory, D.S.,  
14 Semenkovich, C.F., 2016. Fatty acid synthesis configures the plasma membrane for  
15 inflammation in diabetes. *Nature* 539, 294–298. doi:10.1038/nature20117
- 16 Yamamoto, G.L., Baratela, W.A.R., Almeida, T.F., Lazar, M., Afonso, C.L., Oyamada,  
17 M.K., Suzuki, L., Oliveira, L.A.N., Ramos, E.S., Kim, C.A., Passos-Bueno, M.R.,  
18 Bertola, D.R., 2014. Mutations in PCYT1A cause spondylometaphyseal dysplasia with  
19 cone-rod dystrophy. *Am. J. Hum. Genet.* 94, 113–119. doi:10.1016/j.ajhg.2013.11.022
- 20 Yang, X., Sheng, W., Sun, G.Y., Lee, J.C.-M., 2011. Effects of fatty acid unsaturation  
21 numbers on membrane fluidity and  $\alpha$ -secretase-dependent amyloid precursor protein  
22 processing. *Neurochem. Int.* 58, 321–329. doi:10.1016/j.neuint.2010.12.004
- 23 Zhang, D., Tang, W., Yao, P.M., Yang, C., Xie, B., Jackowski, S., Tabas, I., 2000.  
24 Macrophages deficient in CTP:Phosphocholine cytidyltransferase- $\alpha$  are viable  
25 under normal culture conditions but are highly susceptible to free cholesterol-induced  
26 death. Molecular genetic evidence that the induction of phosphatidylcholine  
27 biosynthesis in free cholesterol-loaded macrophages is an adaptive response. *Journal*  
28 *of Biological Chemistry* 275, 35368–35376. doi:10.1074/jbc.M007099200
- 29

1 **Table S1. Biological processes increased in ob/ob compared to WT ATMs at**  
 2 **week 16 and no change at week 5, ranked in ascending order of adjusted p**  
 3 **value.**

4

| name                                                                                                                                             | OB vs WT<br>log.odds.ratio | OB vs WT<br>adjusted.p.value | GO ID      |
|--------------------------------------------------------------------------------------------------------------------------------------------------|----------------------------|------------------------------|------------|
| RNA localization                                                                                                                                 | 0.109695705                | 6.08E-06                     | GO:0006403 |
| microtubule cytoskeleton organization                                                                                                            | 0.093090767                | 6.50E-06                     | GO:0000226 |
| chromatin assembly or disassembly                                                                                                                | 0.072715827                | 1.00E-05                     | GO:0006333 |
| microtubule-based movement                                                                                                                       | 0.090059298                | 2.33E-05                     | GO:0007018 |
| microtubule organizing center organization                                                                                                       | 0.146245681                | 2.61E-05                     | GO:0031023 |
| mRNA transport                                                                                                                                   | 0.109808548                | 3.59E-05                     | GO:0051028 |
| regulation of DNA replication                                                                                                                    | 0.138664509                | 4.54E-05                     | GO:0006275 |
| centrosome organization                                                                                                                          | 0.144335312                | 8.12E-05                     | GO:0051297 |
| nucleobase, nucleoside, nucleotide and nucleic acid transport                                                                                    | 0.099854207                | 0.000111184                  | GO:0015931 |
| mRNA processing                                                                                                                                  | 0.0578393                  | 0.000167041                  | GO:0006397 |
| mRNA metabolic process                                                                                                                           | 0.054040069                | 0.000340716                  | GO:0016071 |
| regulation of DNA metabolic process                                                                                                              | 0.096223508                | 0.000421682                  | GO:0051052 |
| nuclear export                                                                                                                                   | 0.114899289                | 0.000538998                  | GO:0051168 |
| ER to Golgi vesicle-mediated transport                                                                                                           | 0.123039145                | 0.000781143                  | GO:0006888 |
| sphingolipid metabolic process                                                                                                                   | 0.100679526                | 0.000805755                  | GO:0006665 |
| cytoskeleton-dependent intracellular transport                                                                                                   | 0.076563482                | 0.00088951                   | GO:0030705 |
| mitochondrial transport                                                                                                                          | 0.100785069                | 0.000903336                  | GO:0006839 |
| negative regulation of adaptive immune response                                                                                                  | 0.141384187                | 0.000996114                  | GO:0002820 |
| negative regulation of adaptive immune response based on somatic recombination of immune receptors built from immunoglobulin superfamily domains | 0.141384187                | 0.000996114                  | GO:0002823 |
| spindle organization                                                                                                                             | 0.136044423                | 0.000996578                  | GO:0007051 |
| proteasomal protein catabolic process                                                                                                            | 0.116160699                | 0.001202692                  | GO:0010498 |
| proteasomal ubiquitin-dependent protein catabolic process                                                                                        | 0.116160699                | 0.001202692                  | GO:0043161 |
| tetrapyrrole metabolic process                                                                                                                   | 0.118690789                | 0.001216214                  | GO:0033013 |
| negative regulation of leukocyte mediated immunity                                                                                               | 0.138596463                | 0.001265756                  | GO:0002704 |
| negative regulation of lymphocyte mediated immunity                                                                                              | 0.138596463                | 0.001265756                  | GO:0002707 |
| porphyrin metabolic process                                                                                                                      | 0.118893495                | 0.001478977                  | GO:0006778 |
| pigment metabolic process                                                                                                                        | 0.10813916                 | 0.001521217                  | GO:0042440 |
| centrosome duplication                                                                                                                           | 0.150989536                | 0.001774733                  | GO:0051298 |
| regulation of microtubule-based process                                                                                                          | 0.103843338                | 0.002239439                  | GO:0032886 |
| membrane lipid metabolic process                                                                                                                 | 0.063257735                | 0.002637924                  | GO:0006643 |
| B cell homeostasis                                                                                                                               | 0.128008324                | 0.002648853                  | GO:0001782 |
| positive regulation of endocytosis                                                                                                               | 0.12047554                 | 0.002907785                  | GO:0045807 |
| regulation of phagocytosis                                                                                                                       | 0.128076246                | 0.003712153                  | GO:0050764 |
| negative regulation of immune effector process                                                                                                   | 0.124974473                | 0.004112746                  | GO:0002698 |
| posttranscriptional regulation of gene expression                                                                                                | 0.075584143                | 0.004112746                  | GO:0010608 |
| negative regulation of immune response                                                                                                           | 0.118078381                | 0.00413245                   | GO:0050777 |
| protein import into nucleus, docking                                                                                                             | 0.132229562                | 0.004191572                  | GO:0000059 |

|                                                                    |             |             |            |
|--------------------------------------------------------------------|-------------|-------------|------------|
| phagocytosis                                                       | 0.101446635 | 0.00503594  | GO:0006909 |
| cellular lipid catabolic process                                   | 0.093169711 | 0.00503594  | GO:0044242 |
| myeloid leukocyte activation                                       | 0.105316074 | 0.006950655 | GO:0002274 |
| regulation of mitosis                                              | 0.106515089 | 0.007362457 | GO:0007088 |
| cofactor catabolic process                                         | 0.11107813  | 0.007622515 | GO:0051187 |
| positive regulation of phagocytosis                                | 0.128128292 | 0.007785139 | GO:0050766 |
| natural killer cell mediated immunity                              | 0.119540819 | 0.008671944 | GO:0002228 |
| natural killer cell mediated cytotoxicity                          | 0.119540819 | 0.008671944 | GO:0042267 |
| RNA splicing                                                       | 0.051881202 | 0.008977949 | GO:0008380 |
| protein ubiquitination                                             | 0.079124981 | 0.00903524  | GO:0016567 |
| phospholipid biosynthetic process                                  | 0.084888604 | 0.009600299 | GO:0008654 |
| protein export from nucleus                                        | 0.130373098 | 0.009827841 | GO:0006611 |
| regulation of mitotic metaphase/anaphase transition                | 0.140486196 | 0.010926482 | GO:0030071 |
| protein modification by small protein conjugation                  | 0.07415241  | 0.012375254 | GO:0032446 |
| establishment or maintenance of chromatin architecture             | 0.04324993  | 0.012884899 | GO:0006325 |
| membrane lipid biosynthetic process                                | 0.07747481  | 0.013692795 | GO:0046467 |
| amino acid transport                                               | 0.082876543 | 0.017506793 | GO:0006865 |
| homophilic cell adhesion                                           | 0.072883396 | 0.020657461 | GO:0007156 |
| meiosis I                                                          | 0.1025323   | 0.022072268 | GO:0007127 |
| sterol transport                                                   | 0.117152176 | 0.025155824 | GO:0015918 |
| cholesterol transport                                              | 0.117152176 | 0.025155824 | GO:0030301 |
| glycerophospholipid metabolic process                              | 0.077396853 | 0.025221219 | GO:0006650 |
| coenzyme catabolic process                                         | 0.107467379 | 0.031451225 | GO:0009109 |
| macroautophagy                                                     | 0.124851577 | 0.03246804  | GO:0016236 |
| immune response-regulating cell surface receptor signaling pathway | 0.092804257 | 0.035270204 | GO:0002768 |
| tricarboxylic acid cycle                                           | 0.114235727 | 0.035778842 | GO:0006099 |
| posttranscriptional gene silencing                                 | 0.125397712 | 0.041310187 | GO:0016441 |
| posttranscriptional gene silencing by RNA                          | 0.125397712 | 0.041310187 | GO:0035194 |
| regulation of endocytosis                                          | 0.091158719 | 0.044384454 | GO:0030100 |
| regulation of translation                                          | 0.076317448 | 0.044950188 | GO:0006417 |
| embryonic cleavage                                                 | 0.136020547 | 0.046564678 | GO:0040016 |
| immune response-activating signal transduction                     | 0.089300606 | 0.04715384  | GO:0002757 |
| acetyl-CoA catabolic process                                       | 0.111487385 | 0.048713909 | GO:0046356 |
| DNA damage response, signal transduction                           | 0.086685282 | 0.04960336  | GO:0042770 |

1  
2



1 **Table S2. Differentially regulated GO biological processes in eWAT isolated**  
 2 **from ob/ob BMT Pcyt1a<sup>fl/fl</sup> and Pcyt1a<sup>fl/fl</sup> LysM-Cre mice, ranked in ascending**  
 3 **order of p value.**

4

| Pathway/term                                                                                                     | Direction | statistic    | p.value     |
|------------------------------------------------------------------------------------------------------------------|-----------|--------------|-------------|
| insulin receptor signaling pathway                                                                               | UP        | 3.130495169  | 0.000582751 |
| circadian rhythm                                                                                                 | UP        | 3.130495169  | 0.000582751 |
| cellular response to growth factor stimulus                                                                      | UP        | 2.874944543  | 0.002331002 |
| positive regulation of phosphatidylinositol 3-kinase signaling                                                   | DOWN      | -2.874944543 | 0.002331002 |
| cellular response to zinc ion                                                                                    | UP        | 2.74716923   | 0.004079254 |
| extracellular matrix constituent secretion                                                                       | UP        | 2.74716923   | 0.004079254 |
| positive regulation of transcription from RNA polymerase II promoter in response to endoplasmic reticulum stress | UP        | 2.74716923   | 0.004079254 |
| negative regulation of endoplasmic reticulum stress-induced intrinsic apoptotic signaling pathway                | UP        | 2.74716923   | 0.004079254 |
| regulation of necrotic cell death                                                                                | DOWN      | -2.74716923  | 0.004079254 |
| cellular response to insulin stimulus                                                                            | UP        | 2.619393917  | 0.006993007 |
| mRNA transcription from RNA polymerase II promoter                                                               | UP        | 2.619393917  | 0.006993007 |
| negative regulation of BMP signaling pathway                                                                     | UP        | 2.619393917  | 0.006993007 |
| protein processing                                                                                               | DOWN      | -2.619393917 | 0.006993007 |
| brain-derived neurotrophic factor receptor signaling pathway                                                     | UP        | 2.491618604  | 0.011072261 |
| regulation of GTPase activity                                                                                    | UP        | 2.491618604  | 0.011072261 |
| intracellular signal transduction                                                                                | UP        | 2.491618604  | 0.011072261 |
| IRES-dependent translational initiation                                                                          | UP        | 2.491618604  | 0.011072261 |
| negative regulation of translational initiation                                                                  | UP        | 2.491618604  | 0.011072261 |
| inner ear development                                                                                            | DOWN      | -2.491618604 | 0.011072261 |
| positive regulation of fever generation                                                                          | DOWN      | -2.491618604 | 0.011072261 |
| positive regulation of tumor necrosis factor-mediated signaling pathway                                          | DOWN      | -2.491618604 | 0.011072261 |
| positive regulation of I-kappaB phosphorylation                                                                  | DOWN      | -2.491618604 | 0.011072261 |
| regulation of JNK cascade                                                                                        | DOWN      | -2.491618604 | 0.011072261 |
| cellular protein complex assembly                                                                                | DOWN      | -2.491618604 | 0.011072261 |
| regulation of protein phosphorylation                                                                            | DOWN      | -2.491618604 | 0.011072261 |
| negative regulation of cytokine secretion involved in immune response                                            | DOWN      | -2.491618604 | 0.011072261 |
| glomerulus vasculature development                                                                               | DOWN      | -2.491618604 | 0.011072261 |
| regulation of macrophage migration inhibitory factor signaling pathway                                           | DOWN      | -2.491618604 | 0.011072261 |
| regulation of tumor necrosis factor production                                                                   | DOWN      | -2.491618604 | 0.011072261 |
| negative regulation of vascular permeability                                                                     | DOWN      | -2.491618604 | 0.011072261 |
| cell-substrate adhesion                                                                                          | DOWN      | -2.491618604 | 0.011072261 |
| negative regulation of protein import into nucleus                                                               | DOWN      | -2.491618604 | 0.011072261 |
| regulation of protein binding                                                                                    | DOWN      | -2.491618604 | 0.011072261 |
| negative regulation of protein phosphorylation                                                                   | DOWN      | -2.491618604 | 0.011072261 |
| negative regulation of cell-substrate adhesion                                                                   | DOWN      | -2.491618604 | 0.011072261 |
| fructose 6-phosphate metabolic process                                                                           | UP        | 2.491618604  | 0.011072261 |
| negative regulation of insulin secretion                                                                         | UP        | 2.491618604  | 0.011072261 |
| glycolytic process through fructose-6-phosphate                                                                  | UP        | 2.491618604  | 0.011072261 |
| response to glucose                                                                                              | UP        | 2.491618604  | 0.011072261 |
| malonyl-CoA catabolic process                                                                                    | UP        | 2.491618604  | 0.011072261 |
| positive regulation of fatty acid oxidation                                                                      | UP        | 2.491618604  | 0.011072261 |
| regulation of establishment or maintenance of cell polarity                                                      | DOWN      | -2.491618604 | 0.011072261 |
| multicellular organism growth                                                                                    | DOWN      | -2.491618604 | 0.011072261 |

|                                                                                                            |      |              |             |
|------------------------------------------------------------------------------------------------------------|------|--------------|-------------|
| prostate gland growth                                                                                      | DOWN | -2.491618604 | 0.011072261 |
| insulin-like growth factor receptor signaling pathway                                                      | DOWN | -2.491618604 | 0.011072261 |
| chondroitin sulfate proteoglycan biosynthetic process                                                      | DOWN | -2.491618604 | 0.011072261 |
| antigen receptor-mediated signaling pathway                                                                | UP   | 2.491618604  | 0.011072261 |
| neutrophil apoptotic process                                                                               | UP   | 2.491618604  | 0.011072261 |
| negative regulation of chemokine biosynthetic process                                                      | UP   | 2.491618604  | 0.011072261 |
| negative regulation of hormone secretion                                                                   | UP   | 2.491618604  | 0.011072261 |
| positive regulation of T-helper 2 cell differentiation                                                     | UP   | 2.491618604  | 0.011072261 |
| branching involved in salivary gland morphogenesis                                                         | UP   | 2.491618604  | 0.011072261 |
| cellular response to interleukin-1                                                                         | UP   | 2.491618604  | 0.011072261 |
| cellular response to tumor necrosis factor                                                                 | UP   | 2.491618604  | 0.011072261 |
| positive regulation of neuron projection development                                                       | UP   | 2.363843291  | 0.017482518 |
| nerve growth factor signaling pathway                                                                      | UP   | 2.363843291  | 0.017482518 |
| cellular response to nerve growth factor stimulus                                                          | UP   | 2.363843291  | 0.017482518 |
| positive regulation of synapse assembly                                                                    | UP   | 2.363843291  | 0.017482518 |
| nervous system development                                                                                 | UP   | 2.363843291  | 0.017482518 |
| negative regulation of anoikis                                                                             | UP   | 2.363843291  | 0.017482518 |
| cellular response to organic substance                                                                     | DOWN | -2.363843291 | 0.017482518 |
| cellular response to amino acid starvation                                                                 | UP   | 2.363843291  | 0.017482518 |
| regulation of microtubule-based movement                                                                   | UP   | 2.363843291  | 0.017482518 |
| extracellular matrix organization                                                                          | DOWN | -2.363843291 | 0.017482518 |
| interleukin-6-mediated signaling pathway                                                                   | UP   | 2.363843291  | 0.017482518 |
| inositol trisphosphate biosynthetic process                                                                | DOWN | -2.363843291 | 0.017482518 |
| tumor necrosis factor-mediated signaling pathway                                                           | DOWN | -2.363843291 | 0.017482518 |
| cellular extravasation                                                                                     | DOWN | -2.363843291 | 0.017482518 |
| positive regulation of translational initiation by iron                                                    | DOWN | -2.363843291 | 0.017482518 |
| regulation of branching involved in salivary gland morphogenesis                                           | DOWN | -2.363843291 | 0.017482518 |
| negative regulation of alkaline phosphatase activity                                                       | DOWN | -2.363843291 | 0.017482518 |
| negative regulation of glucose import                                                                      | DOWN | -2.363843291 | 0.017482518 |
| regulation of protein secretion                                                                            | DOWN | -2.363843291 | 0.017482518 |
| regulation of reactive oxygen species metabolic process                                                    | DOWN | -2.363843291 | 0.017482518 |
| defense response to bacterium                                                                              | DOWN | -2.363843291 | 0.017482518 |
| negative regulation of NF-kappaB transcription factor activity                                             | DOWN | -2.363843291 | 0.017482518 |
| hydrogen peroxide catabolic process                                                                        | DOWN | -2.363843291 | 0.017482518 |
| protein acetylation                                                                                        | UP   | 2.363843291  | 0.017482518 |
| positive regulation of transcription from RNA polymerase II promoter involved in unfolded protein response | UP   | 2.363843291  | 0.017482518 |
| protein stabilization                                                                                      | UP   | 2.363843291  | 0.017482518 |
| release of sequestered calcium ion into cytosol by sarcoplasmic reticulum                                  | UP   | 2.363843291  | 0.017482518 |
| response to caffeine                                                                                       | UP   | 2.363843291  | 0.017482518 |
| cellular response to caffeine                                                                              | UP   | 2.363843291  | 0.017482518 |
| growth hormone secretion                                                                                   | UP   | 2.363843291  | 0.017482518 |
| positive regulation of tyrosine phosphorylation of Stat5 protein                                           | UP   | 2.363843291  | 0.017482518 |
| programmed necrotic cell death                                                                             | DOWN | -2.363843291 | 0.017482518 |
| positive regulation of innate immune response                                                              | DOWN | -2.363843291 | 0.017482518 |
| regulation of blood pressure                                                                               | DOWN | -2.363843291 | 0.017482518 |
| response to organic substance                                                                              | DOWN | -2.236067978 | 0.026223776 |
| cellular response to lipopolysaccharide                                                                    | UP   | 2.236067978  | 0.026223776 |
| epidermal growth factor receptor signaling pathway                                                         | UP   | 2.236067978  | 0.026223776 |
| regulation of multicellular organism growth                                                                | UP   | 2.236067978  | 0.026223776 |

|                                                                                                  |      |              |             |
|--------------------------------------------------------------------------------------------------|------|--------------|-------------|
| JAK-STAT cascade                                                                                 | UP   | 2.236067978  | 0.026223776 |
| positive regulation of interleukin-6 production                                                  | DOWN | -2.236067978 | 0.026223776 |
| organ induction                                                                                  | UP   | 2.236067978  | 0.026223776 |
| positive regulation of epithelial cell proliferation                                             | UP   | 2.236067978  | 0.026223776 |
| leukocyte migration                                                                              | DOWN | -2.236067978 | 0.026223776 |
| positive regulation of JNK cascade                                                               | DOWN | -2.236067978 | 0.026223776 |
| response to molecule of bacterial origin                                                         | DOWN | -2.236067978 | 0.026223776 |
| positive regulation of protein kinase B signaling                                                | DOWN | -2.236067978 | 0.026223776 |
| positive regulation of cerebellar granule cell precursor proliferation                           | DOWN | -2.236067978 | 0.026223776 |
| glucose homeostasis                                                                              | UP   | 2.236067978  | 0.026223776 |
| activation of cysteine-type endopeptidase activity involved in apoptotic process by cytochrome c | DOWN | -2.236067978 | 0.026223776 |
| positive regulation of extrinsic apoptotic signaling pathway in absence of ligand                | DOWN | -2.236067978 | 0.026223776 |
| positive regulation of axon regeneration                                                         | UP   | 2.236067978  | 0.026223776 |
| early endosome to late endosome transport                                                        | DOWN | -2.236067978 | 0.026223776 |
| muscle fiber development                                                                         | DOWN | -2.236067978 | 0.026223776 |
| collagen catabolic process                                                                       | DOWN | -2.236067978 | 0.026223776 |
| B cell receptor signaling pathway                                                                | UP   | 2.108292665  | 0.037878788 |
| platelet-derived growth factor receptor-alpha signaling pathway                                  | DOWN | -2.108292665 | 0.037878788 |
| positive regulation of chemotaxis                                                                | DOWN | -2.108292665 | 0.037878788 |
| positive regulation of MAP kinase activity                                                       | DOWN | -2.108292665 | 0.037878788 |
| apoptotic process                                                                                | DOWN | -2.108292665 | 0.037878788 |
| vesicle targeting                                                                                | DOWN | -2.108292665 | 0.037878788 |
| liver regeneration                                                                               | DOWN | -2.108292665 | 0.037878788 |
| embryo implantation                                                                              | DOWN | -2.108292665 | 0.037878788 |
| proteolysis                                                                                      | DOWN | -2.108292665 | 0.037878788 |
| angiogenesis                                                                                     | UP   | 2.108292665  | 0.037878788 |
| activation of MAPK activity                                                                      | UP   | 2.108292665  | 0.037878788 |
| cellular response to glucose stimulus                                                            | DOWN | -2.108292665 | 0.037878788 |
| brown fat cell differentiation                                                                   | UP   | 2.108292665  | 0.037878788 |
| negative regulation of fibroblast proliferation                                                  | UP   | 2.108292665  | 0.037878788 |
| white fat cell differentiation                                                                   | UP   | 2.108292665  | 0.037878788 |
| positive regulation of establishment of protein localization to plasma membrane                  | DOWN | -2.108292665 | 0.037878788 |
| protein localization to cell surface                                                             | DOWN | -2.108292665 | 0.037878788 |
| embryonic hemopoiesis                                                                            | UP   | 2.108292665  | 0.037878788 |
| movement of cell or subcellular component                                                        | UP   | 2.108292665  | 0.037878788 |

1

- 1 **Table S3. Sequences of primers used in this publication.**  
 2 FAM/TAMRA reporter and quencher detection system was used for genes with  
 3 indicated probe sequences, and SYBR was used for the remaining genes.  
 4

| Gene                    | Forward primer (5'-3')         | Reverse primer (5'-3')         | Probe (5'-3')                   |
|-------------------------|--------------------------------|--------------------------------|---------------------------------|
| <i>18s</i>              | CGGCTACCACATCCAAGG<br>AA       | GCTGGAATTACCGCGGC<br>T         | GAGGGCAAGTCTGGTG<br>CCAG        |
| <i>36b4</i>             | AGATGCAGCAGATCCGCA<br>T        | GTTCTTGCCCATCAGCA<br>CC        |                                 |
| <i>Actb</i><br>(human)  | TGAGATGCGTTGTTACAG<br>GAAGTC   | GACTGGGCCATTCTCCT<br>TAGAGA    | CTTGCCATCCTAAAAGC<br>CACCCCACTT |
| <i>Arg1</i>             | CTCCAAGCCAAAGTCCTTA<br>GAG     | AGGAGCTGTCATTAGGG<br>ACATC     |                                 |
| <i>Atf4</i>             | ATGATGGCTTGCCAGTG              | CCATTTTCTCCAACATCC<br>AATC     |                                 |
| <i>B2m</i><br>(human)   | CGCTCCGTGGCCTTAGC              | AATCTTTGGAGTACGCT<br>GGATAGC   | TGCTCGCGCTACTCTCT<br>CTTTCTGGC  |
| <i>Hspa5</i>            | CTGAGGCGTATTTGGGAA<br>AG       | TCATGACATTCAGTCCAG<br>CAA      |                                 |
| <i>Ddit3</i>            | CCACCACACCTGAAAGCA<br>GAA      | AGGTGAAAGGCAGGGAC<br>TCA       |                                 |
| <i>Elovl5</i>           | TTCGATGCGTCACTCAGTA<br>CCT     | TGTCCAGGAGGAACCAT<br>CCTT      |                                 |
| <i>Elovl6</i>           | TGCAGGAAAAGTGAAGA<br>AGTCT     | ATGCCGACCACCAAAGA<br>TAAA      |                                 |
| <i>Emr1</i>             | CAGATACAGCAATGCCAA<br>GCA      | GATTGTGAAGGTAGCAT<br>TCACAAGTG |                                 |
| <i>ERdj4</i>            | CACAAAGATGCCTTTTCTA<br>CCG     | TTAAACTTTTCAGCTTAA<br>TGACGTG  |                                 |
| <i>Fads1</i>            | TGCACCCCCTCTTCTTCG<br>CC       | AGGCTGGGGTCCGATG<br>AGG        |                                 |
| <i>Fads2</i>            | AGCCCTGGTTTTCTCAAC<br>T        | GTTGTGACGTGGCATAG<br>TGG       |                                 |
| <i>Fasn</i>             | GCCCAGACAGAGAAGAGG<br>CA       | CTGACTCGGGCAACTTC<br>CC        | GGAGGAGGTGGTGATA<br>GCCGGTATGTC |
| <i>Fatp1</i>            | CGTTTCGATGGTTATGTTA<br>GTGACA  | CATCACTAGCACGTCAC<br>CTGAGA    |                                 |
| <i>Gapdh</i><br>(human) | CCAGGTGGTCTCCTCTGA<br>CTTC     | TCATACCAGGAAATGAG<br>CTTGACA   | ACAGCGACACCCACTC<br>CTCCACCTT   |
| <i>Glut4</i>            | ACTCATTCTTGACGGTTC<br>CTC      | CACCCCGAAGATGAGTG<br>GG        | TGGCGCCTACTCAGGG<br>CTAACATCA   |
| <i>Il10</i>             | CAGAGCCACATGCTCCTA<br>GA       | TGTCCAGCTGGTCCTTT<br>GTT       |                                 |
| <i>Insig1</i>           | GCGCTGTATTGCCGTGTT<br>C        | ACAGCTGGACATTATTG<br>GCAAA     | CATCAACCACGCCAGT<br>GCCA        |
| <i>Itgam</i>            | CAGACAGGAAGTAGCAGC<br>TCCT     | CTGGTCATGTTGATGAA<br>GGTGCT    |                                 |
| <i>Itgax</i>            | GGCTATCAAGCATGTCATA<br>ACAGAAC | CCCCTTGTTTTCTCCCAT<br>CAG      |                                 |

|                               |                                                |                                 |                                   |
|-------------------------------|------------------------------------------------|---------------------------------|-----------------------------------|
| <i>Mgl1</i>                   | AGGTCCCTGTCATGCTTCT<br>G                       | GCTGCTGGTGATCCTCT<br>TGT        |                                   |
| <i>Mrc1</i>                   | GCATGGGTTTTACTGCTAC<br>TTGATT                  | CAGGAATGCTTGTTTCATA<br>TCTGTCTT |                                   |
| <i>Pcyt1a</i>                 | TCTGCAGGGAGCGATGAT<br>G                        | TGTGGAGATACCTTCTGT<br>CCTCTGT   | TATAAGCACATCAAGGA<br>CGCAGGCATGTT |
| <i>Pcyt1a</i><br>(human)      | Commercial assay (Hs00192339_m1, Thermofisher) |                                 |                                   |
| <i>Pcyt1b</i>                 | CAGTGCCAAGCACCTCAT<br>GA                       | GGCCTATCAACTGGTGT<br>TCCTAA     |                                   |
| <i>Polr2a</i><br>(human)      | GCTATAAGGTGGAACGGC<br>ACAT                     | ACCCGATGCCCATCAT                | AACCGGCAGCCAACTC<br>TGCACAA       |
| <i>Scd1</i>                   | CTTGCGGATCTTCCTTATC<br>ATT                     | GATCTCGGGCCCATTCG               | ACCATGGCGTTCCAGA<br>ATGACGTGT     |
| <i>Scd2</i>                   | TGGTTTCCATGGGAGCTG                             | TTGATGTGCCAGCGGTA<br>CT         |                                   |
| <i>Srebf1</i>                 | GCCATGGATTGCACATTT<br>GA                       | GGCCCGGGAAGTCACTG               | GACATGCTCCAGCTCA<br>TCAACAACCAAG  |
| <i>Tbp</i>                    | CAAACCCAGAATTGTTCTC<br>CTT                     | ATGTGGTCTTCCTGAATC<br>CCT       |                                   |
| <i>Tnf</i>                    | CATCTTCTCAAAATTCGAG<br>TGACAA                  | TGGGAGTAGACAAGGTA<br>CAACCC     | CACGTCGTAGCAAACC<br>ACCAAGTGGA    |
| <i>Xbp1</i><br><i>spliced</i> | AGCTTTTACGGGAGAAAA<br>CTCA                     | GCCTGCACCTGCTGCG                |                                   |
| <i>Xbp1</i><br><i>total</i>   | ACACGCTTGGGAATGGAC<br>AC                       | CCATGGGAAGATGTTCT<br>GGG        |                                   |

1
